# Supplementary material for: Association of Wolbachia with gene expression in Drosophila testes
Source: Research Square preprint supplement (doi:10.21203/rs.3.rs-188597/v1), 2021-02-09
Supplement: Supplementary file 1 [file 0a44a52c65582f4d70c909cf.xlsx]

## Sheet: DmelW up-regulated genes
ONTOLOGY	ID	Description	GeneRatio	BgRatio	pvalue	p.adjust	qvalue	geneID	Count
GO:0006013	BP	GO:0006013	mannose metabolic process	6/308	10/12275	4.59e-08	5.52e-05	5.4e-05	LManIII/LManI/LManII/LManVI/LManV/LManIV	6
GO:0006517	BP	GO:0006517	protein deglycosylation	6/308	17/12275	2.33e-06	0.00140259	0.00137218	LManIII/LManI/LManII/LManVI/LManV/LManIV	6
GO:0015850	BP	GO:0015850	organic hydroxy compound transport	6/308	26/12275	3.58e-05	0.0143737	0.0140621	Npc1b/Npc2f/Npc2e/Syt12/Npc2d/Nrx-1	6
GO:0016042	BP	GO:0016042	lipid catabolic process	11/308	122/12275	0.000245229	0.0452787	0.044297	Acox57D-d/CG18258/Yp1/Gba1a/Yp2/CG6296/CG3699/CG6277/CG10116/CG15533/CG15534	11
GO:0007305	BP	GO:0007305	vitelline membrane formation involved in chorion-containing eggshell formation	4/308	14/12275	0.000318892	0.0452787	0.044297	Vml/Cp36/Vm26Ab/Vm26Aa	4
GO:0015918	BP	GO:0015918	sterol transport	4/308	14/12275	0.000318892	0.0452787	0.044297	Npc1b/Npc2f/Npc2e/Npc2d	4
GO:0030704	BP	GO:0030704	vitelline membrane formation	4/308	14/12275	0.000318892	0.0452787	0.044297	Vml/Cp36/Vm26Ab/Vm26Aa	4
GO:0035803	BP	GO:0035803	egg coat formation	4/308	14/12275	0.000318892	0.0452787	0.044297	Vml/Cp36/Vm26Ab/Vm26Aa	4
GO:0050953	BP	GO:0050953	sensory perception of light stimulus	5/308	25/12275	0.000338462	0.0452787	0.044297	Crys/sif/CG5921/ninaE/Rh5	5
GO:0043171	BP	GO:0043171	peptide catabolic process	5/308	26/12275	0.000410521	0.0494268	0.0483551	CG8773/CG31233/CG42335/CG31343/CG31198	5
GO:0019318	BP	GO:0019318	hexose metabolic process	7/308	58/12275	0.000587071	0.0642575	0.0628643	LManIII/LManI/LManII/LManVI/LManV/LManIV/Gld	7
GO:0085029	BP	GO:0085029	extracellular matrix assembly	4/308	17/12275	0.00071439	0.0716771	0.070123	Vml/Cp36/Vm26Ab/Vm26Aa	4
GO:0009266	BP	GO:0009266	response to temperature stimulus	11/308	140/12275	0.000795589	0.0736838	0.0720861	Hsp70Aa/osk/TotC/rdgA/CG10912/TotM/ninaE/TotX/Dh31/TotA/Rh5	11
GO:0042445	BP	GO:0042445	hormone metabolic process	7/308	65/12275	0.00117081	0.0937484	0.0917158	AstA/Est-6/CG9512/CG9521/jhamt/CG9522/AstC	7
GO:0034754	BP	GO:0034754	cellular hormone metabolic process	6/308	48/12275	0.00120124	0.0937484	0.0917158	AstA/CG9512/CG9521/jhamt/CG9522/AstC	6
GO:0071482	BP	GO:0071482	cellular response to light stimulus	6/308	49/12275	0.00134048	0.0937484	0.0917158	TotC/rdgA/ninaE/TotA/ninaD/Rh5	6
GO:0007601	BP	GO:0007601	visual perception	4/308	20/12275	0.00137046	0.0937484	0.0917158	Crys/sif/ninaE/Rh5	4
GO:0005996	BP	GO:0005996	monosaccharide metabolic process	7/308	67/12275	0.00140156	0.0937484	0.0917158	LManIII/LManI/LManII/LManVI/LManV/LManIV/Gld	7
GO:0007304	BP	GO:0007304	chorion-containing eggshell formation	10/308	129/12275	0.00151019	0.0956984	0.0936235	Cp16/Vml/Cp7Fc/Pxt/CG31926/Muc12Ea/Cp36/Vm26Ab/Cp7Fa/Vm26Aa	10
GO:0030703	BP	GO:0030703	eggshell formation	10/308	132/12275	0.00179456	0.108032	0.10569	Cp16/Vml/Cp7Fc/Pxt/CG31926/Muc12Ea/Cp36/Vm26Ab/Cp7Fa/Vm26Aa	10
GO:0030301	BP	GO:0030301	cholesterol transport	3/308	11/12275	0.00222251	0.127424	0.124661	Npc1b/Npc2f/Npc2d	3
GO:0007218	BP	GO:0007218	neuropeptide signaling pathway	6/308	56/12275	0.00268873	0.145917	0.142753	AstA/Nplp1/Tk/Dh31/AstC/Proc	6
GO:0030149	BP	GO:0030149	sphingolipid catabolic process	3/308	12/12275	0.00290865	0.145917	0.142753	Gba1a/CG15533/CG15534	3
GO:0046466	BP	GO:0046466	membrane lipid catabolic process	3/308	12/12275	0.00290865	0.145917	0.142753	Gba1a/CG15533/CG15534	3
GO:0006333	BP	GO:0006333	chromatin assembly or disassembly	10/308	142/12275	0.00306939	0.147822	0.144617	His1:CG33816/His1:CG33843/His2B:CG33884/His2B:CG33888/His2B:CG33904/His2B:CG33890/His1:CG33864/His2B:CG33902/pgc/His2B:CG33874	10
GO:0006721	BP	GO:0006721	terpenoid metabolic process	3/308	13/12275	0.00371153	0.171873	0.168146	AstA/jhamt/AstC	3
GO:0034605	BP	GO:0034605	cellular response to heat	5/308	43/12275	0.00424365	0.189235	0.185132	Hsp70Aa/TotC/TotM/TotX/TotA	5
GO:0008610	BP	GO:0008610	lipid biosynthetic process	13/308	225/12275	0.00448188	0.192721	0.188542	CG11453/AstA/CG5568/rdgA/Pxt/CG9993/jhamt/CG17999/CG11162/AstC/CG8834/CG15533/CG15534	13
GO:0010817	BP	GO:0010817	regulation of hormone levels	7/308	85/12275	0.00543057	0.225462	0.220574	AstA/Est-6/CG9512/CG9521/jhamt/CG9522/AstC	7
GO:0034644	BP	GO:0034644	cellular response to UV	3/308	15/12275	0.00568942	0.226124	0.221221	TotC/TotA/ninaD	3
GO:0009411	BP	GO:0009411	response to UV	4/308	30/12275	0.00636694	0.226124	0.221221	TotC/ninaE/TotA/ninaD	4
GO:0009607	BP	GO:0009607	response to biotic stimulus	19/308	404/12275	0.00652047	0.226124	0.221221	IM33/GATAe/vvl/DptB/TotC/LysB/PGRP-SC2/Tehao/TotM/CecB/Drs/TotX/TotA/SP2353/CG34215/Npc2e/Pebp1/Vm26Ab/Drsl3	19
GO:0043207	BP	GO:0043207	response to external biotic stimulus	19/308	404/12275	0.00652047	0.226124	0.221221	IM33/GATAe/vvl/DptB/TotC/LysB/PGRP-SC2/Tehao/TotM/CecB/Drs/TotX/TotA/SP2353/CG34215/Npc2e/Pebp1/Vm26Ab/Drsl3	19
GO:0051707	BP	GO:0051707	response to other organism	19/308	404/12275	0.00652047	0.226124	0.221221	IM33/GATAe/vvl/DptB/TotC/LysB/PGRP-SC2/Tehao/TotM/CecB/Drs/TotX/TotA/SP2353/CG34215/Npc2e/Pebp1/Vm26Ab/Drsl3	19
GO:0006869	BP	GO:0006869	lipid transport	6/308	67/12275	0.00657338	0.226124	0.221221	Npc1b/Npc2f/Npc2e/ninaD/Npc2d/Nrx-1	6
GO:0050878	BP	GO:0050878	regulation of body fluid levels	3/308	16/12275	0.00687377	0.229785	0.224803	ine/Dh31/Hml	3
GO:0071478	BP	GO:0071478	cellular response to radiation	6/308	68/12275	0.00706149	0.229785	0.224803	TotC/rdgA/ninaE/TotA/ninaD/Rh5	6
GO:0009617	BP	GO:0009617	response to bacterium	14/308	270/12275	0.00828514	0.262508	0.256817	IM33/DptB/TotC/LysB/PGRP-SC2/TotM/CecB/Drs/TotX/TotA/SP2353/Npc2e/Pebp1/Vm26Ab	14
GO:0006633	BP	GO:0006633	fatty acid biosynthetic process	6/308	71/12275	0.008683	0.26806	0.262248	CG11453/CG5568/Pxt/CG9993/CG17999/CG8834	6
GO:0006959	BP	GO:0006959	humoral immune response	9/308	141/12275	0.00913057	0.27483	0.268871	GATAe/vvl/DptB/PGRP-SC2/Tehao/CecB/Drs/Pebp1/Hml	9
GO:0043052	BP	GO:0043052	thermotaxis	3/308	18/12275	0.00965227	0.283447	0.277302	rdgA/ninaE/Rh5	3
GO:0006672	BP	GO:0006672	ceramide metabolic process	3/308	19/12275	0.0112524	0.315067	0.308236	Gba1a/CG15533/CG15534	3
GO:0008299	BP	GO:0008299	isoprenoid biosynthetic process	3/308	19/12275	0.0112524	0.315067	0.308236	AstA/jhamt/AstC	3
GO:0044255	BP	GO:0044255	cellular lipid metabolic process	18/308	399/12275	0.0119462	0.326892	0.319804	CG11453/Acox57D-d/AstA/CG5568/mag/CG7365/rdgA/Gba1a/CG8093/Pxt/CG9993/jhamt/CG17999/CG3699/AstC/CG8834/CG15533/CG15534	18
GO:0019730	BP	GO:0019730	antimicrobial humoral response	8/308	123/12275	0.0122565	0.327929	0.320819	GATAe/vvl/DptB/PGRP-SC2/Tehao/CecB/Drs/Pebp1	8
GO:0006631	BP	GO:0006631	fatty acid metabolic process	8/308	125/12275	0.0134147	0.348772	0.34121	CG11453/Acox57D-d/CG5568/Pxt/CG9993/CG17999/CG3699/CG8834	8
GO:0007602	BP	GO:0007602	phototransduction	5/308	57/12275	0.0139045	0.348772	0.34121	rdgA/shakB/ninaE/ninaD/Rh5	5
GO:0050830	BP	GO:0050830	defense response to Gram-positive bacterium	5/308	57/12275	0.0139045	0.348772	0.34121	DptB/PGRP-SC2/TotM/CecB/Pebp1	5
GO:0042446	BP	GO:0042446	hormone biosynthetic process	4/308	38/12275	0.0146697	0.360455	0.352639	AstA/Est-6/jhamt/AstC	4
GO:0010927	BP	GO:0010927	cellular component assembly involved in morphogenesis	9/308	156/12275	0.0168557	0.391692	0.3832	Cp16/Vml/fln/Pxt/CG31926/Cp36/Vm26Ab/Act88F/Vm26Aa	9
GO:0071214	BP	GO:0071214	cellular response to abiotic stimulus	6/308	82/12275	0.0169169	0.391692	0.3832	TotC/rdgA/ninaE/TotA/ninaD/Rh5	6
GO:0104004	BP	GO:0104004	cellular response to environmental stimulus	6/308	82/12275	0.0169169	0.391692	0.3832	TotC/rdgA/ninaE/TotA/ninaD/Rh5	6
GO:0009583	BP	GO:0009583	detection of light stimulus	5/308	62/12275	0.0194338	0.441478	0.431905	rdgA/shakB/ninaE/ninaD/Rh5	5
GO:0030312	CC	GO:0030312	external encapsulating structure	16/242	44/11938	1.25e-16	2.4e-14	2.33e-14	CG31928/Cp16/Vml/Cp7Fc/CG4009/Cp19/CG31926/CG13114/Muc12Ea/CG11381/Cp36/CG13083/Vm26Ab/Cp15/Cp7Fa/Vm26Aa	16
GO:0042600	CC	GO:0042600	chorion	13/242	40/11938	5.24e-13	5.06e-11	4.91e-11	CG31928/Cp16/Cp7Fc/CG4009/Cp19/CG31926/CG13114/Muc12Ea/CG11381/Cp36/CG13083/Cp15/Cp7Fa	13
GO:0005774	CC	GO:0005774	vacuolar membrane	7/242	60/11938	0.000199481	0.0107664	0.0104522	LManIII/LManI/LManII/LManVI/LManV/LManIV/Vha100-5	7
GO:0005773	CC	GO:0005773	vacuole	11/242	149/11938	0.000223137	0.0107664	0.0104522	LManIII/LManI/LManII/LManVI/ninaE/LManV/LManIV/CG6337/CG15533/Vha100-5/CG15534	11
GO:0044437	CC	GO:0044437	vacuolar part	7/242	72/11938	0.000619386	0.0237529	0.0230598	LManIII/LManI/LManII/LManVI/LManV/LManIV/Vha100-5	7
GO:0000786	CC	GO:0000786	nucleosome	9/242	120/11938	0.000738432	0.0237529	0.0230598	His1:CG33816/His1:CG33843/His2B:CG33884/His2B:CG33888/His2B:CG33904/His2B:CG33890/His1:CG33864/His2B:CG33902/His2B:CG33874	9
GO:0044815	CC	GO:0044815	DNA packaging complex	9/242	127/11938	0.00110762	0.0305387	0.0296476	His1:CG33816/His1:CG33843/His2B:CG33884/His2B:CG33888/His2B:CG33904/His2B:CG33890/His1:CG33864/His2B:CG33902/His2B:CG33874	9
GO:0000788	CC	GO:0000788	nuclear nucleosome	6/242	67/11938	0.00231816	0.0559255	0.0542937	His2B:CG33884/His2B:CG33888/His2B:CG33904/His2B:CG33890/His2B:CG33902/His2B:CG33874	6
GO:0032993	CC	GO:0032993	protein-DNA complex	9/242	145/11938	0.00276906	0.0593809	0.0576482	His1:CG33816/His1:CG33843/His2B:CG33884/His2B:CG33888/His2B:CG33904/His2B:CG33890/His1:CG33864/His2B:CG33902/His2B:CG33874	9
GO:0000790	CC	GO:0000790	nuclear chromatin	12/242	251/11938	0.00515978	0.0995837	0.096678	His1:CG33816/His1:CG33843/His2B:CG33884/His2B:CG33888/Nipped-B/His2B:CG33904/His2B:CG33890/MED26/His1:CG33864/byn/His2B:CG33902/His2B:CG33874	12
GO:0098862	CC	GO:0098862	cluster of actin-based cell projections	2/242	10/11938	0.0165425	0.290246	0.281777	CG5921/Nha1	2
GO:0036379	CC	GO:0036379	myofilament	2/242	13/11938	0.0275527	0.409917	0.397956	fln/Act88F	2
GO:0044454	CC	GO:0044454	nuclear chromosome part	12/242	316/11938	0.027611	0.409917	0.397956	His1:CG33816/His1:CG33843/His2B:CG33884/His2B:CG33888/Nipped-B/His2B:CG33904/His2B:CG33890/MED26/His1:CG33864/byn/His2B:CG33902/His2B:CG33874	12
GO:0098533	CC	GO:0098533	ATPase dependent transmembrane transport complex	2/242	14/11938	0.0317218	0.437308	0.424548	Mdr50/nrv3	2
GO:0008236	MF	GO:0008236	serine-type peptidase activity	40/292	256/12127	1.43e-21	2.46e-19	2.11e-19	CG31821/CG16749/Jon99Ci/CG18735/CG4053/betaTry/Jon65Aiii/Jon65Aiv/CG6041/CG5246/CG3734/alphaTry/CG11912/CG9673/zetaTry/CG3739/lambdaTry/iotaTry/Jon99Fii/CG31265/Ser8/CG10472/yip7/CG31266/CG17571/Jon99Fi/kappaTry/CG4653/Jon25Biii/CG33127/CG31267/CG17475/CG8299/Jon99Ciii/CG6048/CG11911/Jon99Cii/CG18493/CG17242/etaTry	40
GO:0017171	MF	GO:0017171	serine hydrolase activity	40/292	257/12127	1.66e-21	2.46e-19	2.11e-19	CG31821/CG16749/Jon99Ci/CG18735/CG4053/betaTry/Jon65Aiii/Jon65Aiv/CG6041/CG5246/CG3734/alphaTry/CG11912/CG9673/zetaTry/CG3739/lambdaTry/iotaTry/Jon99Fii/CG31265/Ser8/CG10472/yip7/CG31266/CG17571/Jon99Fi/kappaTry/CG4653/Jon25Biii/CG33127/CG31267/CG17475/CG8299/Jon99Ciii/CG6048/CG11911/Jon99Cii/CG18493/CG17242/etaTry	40
GO:0004175	MF	GO:0004175	endopeptidase activity	46/292	391/12127	1.64e-19	1.41e-17	1.21e-17	CG31928/CG16749/Jon99Ci/CG18735/CG4053/betaTry/Jon65Aiii/Jon65Aiv/CG6041/CG5246/CG15254/alphaTry/CG11912/CG15255/CG9673/zetaTry/CG6974/lambdaTry/iotaTry/CG31926/Jon99Fii/CG31265/Ser8/CG15253/CG10472/yip7/CG31266/CG17571/Jon99Fi/kappaTry/CG7631/CG4653/Jon25Biii/CG6337/CG33127/CG31267/CG17475/Decay/CG8299/Jon99Ciii/CG6048/Prosalpha1/CG11911/Jon99Cii/CG17242/etaTry	46
GO:0004252	MF	GO:0004252	serine-type endopeptidase activity	36/292	231/12127	1.9e-19	1.41e-17	1.21e-17	CG16749/Jon99Ci/CG18735/CG4053/betaTry/Jon65Aiii/Jon65Aiv/CG6041/CG5246/alphaTry/CG11912/CG9673/zetaTry/lambdaTry/iotaTry/Jon99Fii/CG31265/Ser8/CG10472/yip7/CG31266/CG17571/Jon99Fi/kappaTry/CG4653/Jon25Biii/CG33127/CG31267/CG17475/CG8299/Jon99Ciii/CG6048/CG11911/Jon99Cii/CG17242/etaTry	36
GO:0008238	MF	GO:0008238	exopeptidase activity	18/292	103/12127	3.82e-11	2.26e-09	1.94e-09	CG31821/CG18585/CG3734/CG8562/CG7025/Ance-2/CG3739/CG8773/CG31233/CG14820/CG42335/CG32379/CG43235/CG17633/CG31343/CG31198/CG18417/CG18493	18
GO:0008237	MF	GO:0008237	metallopeptidase activity	18/292	144/12127	1.04e-08	5.15e-07	4.43e-07	CG18585/CG15254/CG8562/CG15255/CG7025/Ance-2/CG6974/CG8773/CG31233/CG15253/CG14820/CG42335/CG32379/CG7631/CG17633/CG31343/CG31198/CG18417	18
GO:0008235	MF	GO:0008235	metalloexopeptidase activity	12/292	60/12127	1.51e-08	6.39e-07	5.5e-07	CG18585/CG8562/CG7025/CG8773/CG31233/CG14820/CG42335/CG32379/CG17633/CG31343/CG31198/CG18417	12
GO:0004180	MF	GO:0004180	carboxypeptidase activity	9/292	32/12127	4.15e-08	1.54e-06	1.32e-06	CG31821/CG18585/CG8562/CG7025/CG14820/CG32379/CG43235/CG17633/CG18417	9
GO:0004559	MF	GO:0004559	alpha-mannosidase activity	6/292	14/12127	4.73e-07	1.55e-05	1.34e-05	LManIII/LManI/LManII/LManVI/LManV/LManIV	6
GO:0004181	MF	GO:0004181	metallocarboxypeptidase activity	7/292	23/12127	7.69e-07	2.08e-05	1.79e-05	CG18585/CG8562/CG7025/CG14820/CG32379/CG17633/CG18417	7
GO:0015923	MF	GO:0015923	mannosidase activity	6/292	15/12127	7.72e-07	2.08e-05	1.79e-05	LManIII/LManI/LManII/LManVI/LManV/LManIV	6
GO:0004553	MF	GO:0004553	hydrolase activity, hydrolyzing O-glycosyl compounds	12/292	87/12127	1.07e-06	2.65e-05	2.28e-05	Mal-A1/LManIII/LManI/Mal-A2/LManII/LManVI/Gba1a/LysB/Mal-A4/Mal-A3/LManV/LManIV	12
GO:0016798	MF	GO:0016798	hydrolase activity, acting on glycosyl bonds	12/292	93/12127	2.22e-06	5.04e-05	4.34e-05	Mal-A1/LManIII/LManI/Mal-A2/LManII/LManVI/Gba1a/LysB/Mal-A4/Mal-A3/LManV/LManIV	12
GO:0016298	MF	GO:0016298	lipase activity	11/292	82/12127	4.01e-06	8.47e-05	7.29e-05	CG18258/mag/CG7365/Yp1/CG8093/Yp2/CG6296/CG6277/CG10116/CG15533/CG15534	11
GO:0004177	MF	GO:0004177	aminopeptidase activity	9/292	55/12127	5.79e-06	0.000114169	9.83e-05	CG3734/Ance-2/CG3739/CG8773/CG31233/CG42335/CG31343/CG31198/CG18493	9
GO:0004620	MF	GO:0004620	phospholipase activity	7/292	31/12127	6.99e-06	0.00012934	0.000111309	CG7365/Yp1/Yp2/CG6296/CG6277/CG15533/CG15534	7
GO:0008970	MF	GO:0008970	phospholipase A1 activity	4/292	10/12127	6.17e-05	0.00101416	0.000872782	Yp1/Yp2/CG6296/CG6277	4
GO:0032450	MF	GO:0032450	maltose alpha-glucosidase activity	4/292	10/12127	6.17e-05	0.00101416	0.000872782	Mal-A1/Mal-A2/Mal-A4/Mal-A3	4
GO:0005184	MF	GO:0005184	neuropeptide hormone activity	6/292	33/12127	0.000118529	0.00184655	0.00158914	AstA/Nplp1/Tk/Dh31/AstC/Proc	6
GO:0090599	MF	GO:0090599	alpha-glucosidase activity	4/292	12/12127	0.000139923	0.00207085	0.00178217	Mal-A1/Mal-A2/Mal-A4/Mal-A3	4
GO:0070006	MF	GO:0070006	metalloaminopeptidase activity	5/292	23/12127	0.000184265	0.00259726	0.0022352	CG8773/CG31233/CG42335/CG31343/CG31198	5
GO:0015645	MF	GO:0015645	fatty acid ligase activity	5/292	25/12127	0.000279688	0.00359946	0.00309768	CG11453/CG5568/CG9993/CG17999/CG8834	5
GO:0016405	MF	GO:0016405	CoA-ligase activity	5/292	25/12127	0.000279688	0.00359946	0.00309768	CG11453/CG5568/CG9993/CG17999/CG8834	5
GO:0052689	MF	GO:0052689	carboxylic ester hydrolase activity	9/292	92/12127	0.00036332	0.00431458	0.00371311	Est-P/CG18258/Est-6/mag/Yp1/Yp2/CG6296/CG6277/CG10116	9
GO:0015926	MF	GO:0015926	glucosidase activity	4/292	15/12127	0.000364407	0.00431458	0.00371311	Mal-A1/Mal-A2/Mal-A4/Mal-A3	4
GO:0016878	MF	GO:0016878	acid-thiol ligase activity	5/292	29/12127	0.000577786	0.00657788	0.0056609	CG11453/CG5568/CG9993/CG17999/CG8834	5
GO:0008239	MF	GO:0008239	dipeptidyl-peptidase activity	4/292	18/12127	0.000771623	0.00845927	0.00728003	CG3734/Ance-2/CG3739/CG18493	4
GO:0030246	MF	GO:0030246	carbohydrate binding	10/292	125/12127	0.000869153	0.00918819	0.00790733	LManIII/LManI/CG14499/lectin-37Db/LManII/lectin-24A/LManVI/CG7763/LManV/LManIV	10
GO:0005179	MF	GO:0005179	hormone activity	6/292	51/12127	0.00134114	0.0136888	0.0117806	AstA/Nplp1/Tk/Dh31/AstC/Proc	6
GO:0016877	MF	GO:0016877	ligase activity, forming carbon-sulfur bonds	5/292	37/12127	0.0018126	0.0178843	0.0153912	CG11453/CG5568/CG9993/CG17999/CG8834	5
GO:0009881	MF	GO:0009881	photoreceptor activity	3/292	12/12127	0.00258681	0.0246998	0.0212566	shakB/ninaE/Rh5	3
GO:0071855	MF	GO:0071855	neuropeptide receptor binding	3/292	15/12127	0.00507139	0.0469104	0.0403709	AstA/Tk/Proc	3
GO:0032934	MF	GO:0032934	sterol binding	3/292	16/12127	0.0061317	0.0549995	0.0473324	Npc2f/Npc2e/Npc2d	3
GO:0005496	MF	GO:0005496	steroid binding	3/292	17/12127	0.00731457	0.0636798	0.0548026	Npc2f/Npc2e/Npc2d	3
GO:0015291	MF	GO:0015291	secondary active transmembrane transporter activity	8/292	122/12127	0.00927479	0.0784382	0.0675037	ine/Oatp33Eb/Oatp58Da/CG15406/CG3285/dmGlut/Slc45-1/Nha1	8
GO:0004867	MF	GO:0004867	serine-type endopeptidase inhibitor activity	6/292	79/12127	0.0118465	0.0974048	0.0838263	IM33/Kaz-m1/Spn77Bc/Spn77Bb/CG16713/CG43366	6
GO:0005351	MF	GO:0005351	carbohydrate:proton symporter activity	3/292	21/12127	0.0133283	0.10382	0.0893476	CG15406/CG3285/Slc45-1	3
GO:0005402	MF	GO:0005402	carbohydrate:cation symporter activity	3/292	21/12127	0.0133283	0.10382	0.0893476	CG15406/CG3285/Slc45-1	3
GO:0020037	MF	GO:0020037	heme binding	8/292	135/12127	0.0163684	0.123689	0.106446	CG4009/Pxt/Cyp9b2/Cyp4d1/CG5157/Cyp4d14/Cyp12d1-d/Cyp311a1	8
GO:0046906	MF	GO:0046906	tetrapyrrole binding	8/292	136/12127	0.0170414	0.123689	0.106446	CG4009/Pxt/Cyp9b2/Cyp4d1/CG5157/Cyp4d14/Cyp12d1-d/Cyp311a1	8
GO:0015144	MF	GO:0015144	carbohydrate transmembrane transporter activity	3/292	23/12127	0.0171326	0.123689	0.106446	CG15406/CG3285/Slc45-1	3
GO:0015294	MF	GO:0015294	solute:cation symporter activity	5/292	65/12127	0.0199465	0.140576	0.120979	ine/CG15406/CG3285/dmGlut/Slc45-1	5
GO:0015293	MF	GO:0015293	symporter activity	5/292	66/12127	0.0211706	0.145733	0.125417	ine/CG15406/CG3285/dmGlut/Slc45-1	5
GO:0050660	MF	GO:0050660	flavin adenine dinucleotide binding	5/292	68/12127	0.0237633	0.156946	0.135067	Acox57D-d/CG9512/CG9521/CG9522/Gld	5
GO:0015295	MF	GO:0015295	solute:proton symporter activity	3/292	26/12127	0.0238601	0.156946	0.135067	CG15406/CG3285/Slc45-1	3
GO:0042277	MF	GO:0042277	peptide binding	5/292	69/12127	0.025133	0.161725	0.139181	CG8773/CG31233/CG42335/CG31343/CG31198	5
GO:0008061	MF	GO:0008061	chitin binding	7/292	122/12127	0.0280038	0.174306	0.150007	CG13675/CG32284/CG7714/CG32036/CG42397/CG13075/Hml	7
GO:0004866	MF	GO:0004866	endopeptidase inhibitor activity	6/292	96/12127	0.0282658	0.174306	0.150007	IM33/Kaz-m1/Spn77Bc/Spn77Bb/CG16713/CG43366	6
GO:0030414	MF	GO:0030414	peptidase inhibitor activity	6/292	99/12127	0.0322151	0.190001	0.163514	IM33/Kaz-m1/Spn77Bc/Spn77Bb/CG16713/CG43366	6
GO:0061135	MF	GO:0061135	endopeptidase regulator activity	6/292	99/12127	0.0322151	0.190001	0.163514	IM33/Kaz-m1/Spn77Bc/Spn77Bb/CG16713/CG43366	6
GO:0004222	MF	GO:0004222	metalloendopeptidase activity	5/292	74/12127	0.0327367	0.190001	0.163514	CG15254/CG15255/CG6974/CG15253/CG7631	5
GO:0048018	MF	GO:0048018	receptor ligand activity	6/292	106/12127	0.0427772	0.243501	0.209556	AstA/Nplp1/Tk/Dh31/AstC/Proc	6
GO:0061134	MF	GO:0061134	peptidase regulator activity	6/292	107/12127	0.0444439	0.248215	0.213613	IM33/Kaz-m1/Spn77Bc/Spn77Bb/CG16713/CG43366	6
GO:0022804	MF	GO:0022804	active transmembrane transporter activity	11/292	258/12127	0.0479641	0.262914	0.226263	Mdr50/ine/nrv3/Oatp33Eb/Oatp58Da/CG15406/CG3285/dmGlut/Slc45-1/Nha1/Vha100-5	11
GO:0005534	MF	GO:0005534	galactose binding	2/292	16/12127	0.0555306	0.298856	0.257194	lectin-37Db/lectin-24A	2
GO:0030545	MF	GO:0030545	receptor regulator activity	6/292	114/12127	0.0572419	0.302564	0.260386	AstA/Nplp1/Tk/Dh31/AstC/Proc	6
GO:0004190	MF	GO:0004190	aspartic-type endopeptidase activity	2/292	17/12127	0.0619594	0.310911	0.267569	CG31928/CG31926	2
GO:0070001	MF	GO:0070001	aspartic-type peptidase activity	2/292	17/12127	0.0619594	0.310911	0.267569	CG31928/CG31926	2
GO:0001664	MF	GO:0001664	G protein-coupled receptor binding	4/292	62/12127	0.0619721	0.310911	0.267569	AstA/Tk/Dh31/Proc	4
GO:0033218	MF	GO:0033218	amide binding	5/292	90/12127	0.065911	0.324604	0.279354	CG8773/CG31233/CG42335/CG31343/CG31198	5
GO:0005326	MF	GO:0005326	neurotransmitter transporter activity	3/292	39/12127	0.0668948	0.324604	0.279354	ine/Tk/dmGlut	3
GO:0016811	MF	GO:0016811	hydrolase activity, acting on carbon-nitrogen (but not peptide) bonds, in linear amides	4/292	64/12127	0.0680582	0.324923	0.279628	PGRP-SC2/CG32750/vanin-like/CG6738	4
GO:0005539	MF	GO:0005539	glycosaminoglycan binding	3/292	40/12127	0.0710835	0.33398	0.287422	PGRP-SC2/ihog/Npc2e	3
GO:0042834	MF	GO:0042834	peptidoglycan binding	2/292	19/12127	0.0755166	0.349264	0.300576	PGRP-SC2/Npc2e	2
GO:0005506	MF	GO:0005506	iron ion binding	7/292	154/12127	0.0787529	0.358629	0.308635	Cyp9b2/Cyp4d1/Cyp4d14/CG32500/Cyp12d1-d/CG11162/Cyp311a1	7
GO:0048037	MF	GO:0048037	cofactor binding	14/292	385/12127	0.0823455	0.369307	0.317825	Acox57D-d/CG9512/CG4009/Pxt/CG9521/Cyp9b2/Cyp4d1/CG5157/CG9522/Cyp4d14/CG32500/Cyp12d1-d/Gld/Cyp311a1	14
GO:0004857	MF	GO:0004857	enzyme inhibitor activity	6/292	131/12127	0.0966375	0.426936	0.36742	IM33/Kaz-m1/Spn77Bc/Spn77Bb/CG16713/CG43366	6

## Sheet: DmelW down-regulated genes
ONTOLOGY	ID	Description	GeneRatio	BgRatio	pvalue	p.adjust	qvalue	geneID	Count
GO:0010025	BP	GO:0010025	wax biosynthetic process	4/49	17/12275	5.1335e-07	5.70342e-05	5.31088e-05	CG1441/CG13091/CG10097/CG17560	4
GO:0010166	BP	GO:0010166	wax metabolic process	4/49	17/12275	5.1335e-07	5.70342e-05	5.31088e-05	CG1441/CG13091/CG10097/CG17560	4
GO:0035336	BP	GO:0035336	long-chain fatty-acyl-CoA metabolic process	4/49	18/12275	6.58087e-07	5.70342e-05	5.31088e-05	CG1441/CG13091/CG10097/CG17560	4
GO:0035337	BP	GO:0035337	fatty-acyl-CoA metabolic process	4/49	22/12275	1.55481e-06	0.000101063	9.41068e-05	CG1441/CG13091/CG10097/CG17560	4
GO:1901570	BP	GO:1901570	fatty acid derivative biosynthetic process	4/49	28/12275	4.27602e-06	0.000222353	0.000207049	CG1441/CG13091/CG10097/CG17560	4
GO:1901568	BP	GO:1901568	fatty acid derivative metabolic process	4/49	31/12275	6.51359e-06	0.000282256	0.000262829	CG1441/CG13091/CG10097/CG17560	4
GO:0006333	BP	GO:0006333	chromatin assembly or disassembly	6/49	142/12275	2.00217e-05	0.000712509	0.00066347	His2B:CG33906/His2B:CG33872/His2B:CG33880/His1:CG33804/His2B:CG33896/His2B:CG33894	6
GO:0006637	BP	GO:0006637	acyl-CoA metabolic process	4/49	43/12275	2.46638e-05	0.000712509	0.00066347	CG1441/CG13091/CG10097/CG17560	4
GO:0035383	BP	GO:0035383	thioester metabolic process	4/49	43/12275	2.46638e-05	0.000712509	0.00066347	CG1441/CG13091/CG10097/CG17560	4
GO:0033865	BP	GO:0033865	nucleoside bisphosphate metabolic process	4/49	52/12275	5.26965e-05	0.00114176	0.00106318	CG1441/CG13091/CG10097/CG17560	4
GO:0033875	BP	GO:0033875	ribonucleoside bisphosphate metabolic process	4/49	52/12275	5.26965e-05	0.00114176	0.00106318	CG1441/CG13091/CG10097/CG17560	4
GO:0034032	BP	GO:0034032	purine nucleoside bisphosphate metabolic process	4/49	52/12275	5.26965e-05	0.00114176	0.00106318	CG1441/CG13091/CG10097/CG17560	4
GO:0006732	BP	GO:0006732	coenzyme metabolic process	4/49	152/12275	0.00310669	0.0621339	0.0578575	CG1441/CG13091/CG10097/CG17560	4
GO:0006790	BP	GO:0006790	sulfur compound metabolic process	4/49	161/12275	0.00381793	0.0709044	0.0660243	CG1441/CG13091/CG10097/CG17560	4
GO:0009150	BP	GO:0009150	purine ribonucleotide metabolic process	4/49	252/12275	0.017844	0.285612	0.265955	CG1441/CG13091/CG10097/CG17560	4
GO:0051186	BP	GO:0051186	cofactor metabolic process	4/49	256/12275	0.0187931	0.285612	0.265955	CG1441/CG13091/CG10097/CG17560	4
GO:0006163	BP	GO:0006163	purine nucleotide metabolic process	4/49	259/12275	0.0195252	0.285612	0.265955	CG1441/CG13091/CG10097/CG17560	4
GO:0009259	BP	GO:0009259	ribonucleotide metabolic process	4/49	260/12275	0.0197731	0.285612	0.265955	CG1441/CG13091/CG10097/CG17560	4
GO:0019693	BP	GO:0019693	ribose phosphate metabolic process	4/49	268/12275	0.0218274	0.29869	0.278133	CG1441/CG13091/CG10097/CG17560	4
GO:0072521	BP	GO:0072521	purine-containing compound metabolic process	4/49	288/12275	0.0275226	0.347565	0.323643	CG1441/CG13091/CG10097/CG17560	4
GO:0009117	BP	GO:0009117	nucleotide metabolic process	4/49	317/12275	0.037238	0.347565	0.323643	CG1441/CG13091/CG10097/CG17560	4
GO:0006753	BP	GO:0006753	nucleoside phosphate metabolic process	4/49	320/12275	0.0383431	0.347565	0.323643	CG1441/CG13091/CG10097/CG17560	4
GO:0010830	BP	GO:0010830	regulation of myotube differentiation	1/49	10/12275	0.0392232	0.347565	0.323643	nau	1
GO:0034284	BP	GO:0034284	response to monosaccharide	1/49	10/12275	0.0392232	0.347565	0.323643	Gr43a	1
GO:0060142	BP	GO:0060142	regulation of syncytium formation by plasma membrane fusion	1/49	10/12275	0.0392232	0.347565	0.323643	nau	1
GO:1901739	BP	GO:1901739	regulation of myoblast fusion	1/49	10/12275	0.0392232	0.347565	0.323643	nau	1
GO:0048663	BP	GO:0048663	neuron fate commitment	2/49	80/12275	0.0404956	0.347565	0.323643	mid/Dbx	2
GO:0030381	BP	GO:0030381	chorion-containing eggshell pattern formation	1/49	11/12275	0.0430616	0.347565	0.323643	mid	1
GO:0016556	BP	GO:0016556	mRNA modification	1/49	12/12275	0.046885	0.347565	0.323643	CG3045	1
GO:0042684	BP	GO:0042684	cardioblast cell fate commitment	1/49	12/12275	0.046885	0.347565	0.323643	mid	1
GO:0001522	BP	GO:0001522	pseudouridine synthesis	1/49	13/12275	0.0506934	0.347565	0.323643	CG3045	1
GO:0008343	BP	GO:0008343	adult feeding behavior	1/49	13/12275	0.0506934	0.347565	0.323643	Gr43a	1
GO:0071322	BP	GO:0071322	cellular response to carbohydrate stimulus	1/49	13/12275	0.0506934	0.347565	0.323643	Gr43a	1
GO:0050916	BP	GO:0050916	sensory perception of sweet taste	1/49	14/12275	0.0544869	0.347565	0.323643	Gr43a	1
GO:0051153	BP	GO:0051153	regulation of striated muscle cell differentiation	1/49	14/12275	0.0544869	0.347565	0.323643	nau	1
GO:0016063	BP	GO:0016063	rhodopsin biosynthetic process	1/49	15/12275	0.0582655	0.347565	0.323643	rdhB	1
GO:0034644	BP	GO:0034644	cellular response to UV	1/49	15/12275	0.0582655	0.347565	0.323643	ninaC	1
GO:0051147	BP	GO:0051147	regulation of muscle cell differentiation	1/49	15/12275	0.0582655	0.347565	0.323643	nau	1
GO:0009409	BP	GO:0009409	response to cold	1/49	16/12275	0.0620294	0.347565	0.323643	Fst	1
GO:0045494	BP	GO:0045494	photoreceptor cell maintenance	1/49	16/12275	0.0620294	0.347565	0.323643	ninaC	1
GO:0048634	BP	GO:0048634	regulation of muscle organ development	1/49	16/12275	0.0620294	0.347565	0.323643	nau	1
GO:0048665	BP	GO:0048665	neuron fate specification	1/49	16/12275	0.0620294	0.347565	0.323643	mid	1
GO:0060911	BP	GO:0060911	cardiac cell fate commitment	1/49	16/12275	0.0620294	0.347565	0.323643	mid	1
GO:0016059	BP	GO:0016059	deactivation of rhodopsin mediated signaling	1/49	17/12275	0.0657785	0.347565	0.323643	ninaC	1
GO:0046154	BP	GO:0046154	rhodopsin metabolic process	1/49	17/12275	0.0657785	0.347565	0.323643	rdhB	1
GO:0055086	BP	GO:0055086	nucleobase-containing small molecule metabolic process	4/49	384/12275	0.0664152	0.347565	0.323643	CG1441/CG13091/CG10097/CG17560	4
GO:0006309	BP	GO:0006309	apoptotic DNA fragmentation	1/49	18/12275	0.069513	0.347565	0.323643	CG33346	1
GO:0006921	BP	GO:0006921	cellular component disassembly involved in execution phase of apoptosis	1/49	18/12275	0.069513	0.347565	0.323643	CG33346	1
GO:0010002	BP	GO:0010002	cardioblast differentiation	1/49	18/12275	0.069513	0.347565	0.323643	mid	1
GO:0022400	BP	GO:0022400	regulation of rhodopsin mediated signaling pathway	1/49	18/12275	0.069513	0.347565	0.323643	ninaC	1
GO:0030262	BP	GO:0030262	apoptotic nuclear changes	1/49	18/12275	0.069513	0.347565	0.323643	CG33346	1
GO:0060259	BP	GO:0060259	regulation of feeding behavior	1/49	18/12275	0.069513	0.347565	0.323643	Gr43a	1
GO:0042335	BP	GO:0042335	cuticle development	3/49	242/12275	0.0719473	0.347926	0.323979	Cyp4g1/Cpr47Ee/Cpr66Cb	3
GO:0001895	BP	GO:0001895	retina homeostasis	1/49	19/12275	0.0732328	0.347926	0.323979	ninaC	1
GO:0008038	BP	GO:0008038	neuron recognition	2/49	114/12275	0.0758392	0.347926	0.323979	mid/CG7179	2
GO:0007413	BP	GO:0007413	axonal fasciculation	1/49	20/12275	0.0769381	0.347926	0.323979	mid	1
GO:0014019	BP	GO:0014019	neuroblast development	1/49	20/12275	0.0769381	0.347926	0.323979	mid	1
GO:0006030	BP	GO:0006030	chitin metabolic process	2/49	117/12275	0.0793098	0.347926	0.323979	CG43896/Muc11A	2
GO:0000737	BP	GO:0000737	DNA catabolic process, endonucleolytic	1/49	21/12275	0.0806288	0.347926	0.323979	CG33346	1
GO:0106030	BP	GO:0106030	neuron projection fasciculation	1/49	21/12275	0.0806288	0.347926	0.323979	mid	1
GO:0008037	BP	GO:0008037	cell recognition	2/49	119/12275	0.081651	0.347926	0.323979	mid/CG7179	2
GO:0016056	BP	GO:0016056	rhodopsin mediated signaling pathway	1/49	22/12275	0.0843051	0.347926	0.323979	ninaC	1
GO:0035223	BP	GO:0035223	leg disc pattern formation	1/49	22/12275	0.0843051	0.347926	0.323979	mid	1
GO:1901071	BP	GO:1901071	glucosamine-containing compound metabolic process	2/49	127/12275	0.091226	0.360906	0.336066	CG43896/Muc11A	2
GO:0006308	BP	GO:0006308	DNA catabolic process	1/49	24/12275	0.0916145	0.360906	0.336066	CG33346	1
GO:0035050	BP	GO:0035050	embryonic heart tube development	1/49	24/12275	0.0916145	0.360906	0.336066	mid	1
GO:0048864	BP	GO:0048864	stem cell development	1/49	25/12275	0.0952478	0.367219	0.341945	mid	1
GO:0006040	BP	GO:0006040	amino sugar metabolic process	2/49	131/12275	0.096133	0.367219	0.341945	CG43896/Muc11A	2
GO:0033227	BP	GO:0033227	dsRNA transport	1/49	26/12275	0.0988668	0.367219	0.341945	ninaC	1
GO:0043171	BP	GO:0043171	peptide catabolic process	1/49	26/12275	0.0988668	0.367219	0.341945	CG11951	1
GO:0006821	BP	GO:0006821	chloride transport	1/49	28/12275	0.106062	0.367683	0.342377	CG6938	1
GO:0008277	BP	GO:0008277	regulation of G protein-coupled receptor signaling pathway	1/49	28/12275	0.106062	0.367683	0.342377	ninaC	1
GO:0035051	BP	GO:0035051	cardiocyte differentiation	1/49	28/12275	0.106062	0.367683	0.342377	mid	1
GO:0042659	BP	GO:0042659	regulation of cell fate specification	1/49	28/12275	0.106062	0.367683	0.342377	mid	1
GO:2000736	BP	GO:2000736	regulation of stem cell differentiation	1/49	28/12275	0.106062	0.367683	0.342377	mid	1
GO:0009411	BP	GO:0009411	response to UV	1/49	30/12275	0.113202	0.368954	0.34356	ninaC	1
GO:0014017	BP	GO:0014017	neuroblast fate commitment	1/49	30/12275	0.113202	0.368954	0.34356	mid	1
GO:0007526	BP	GO:0007526	larval somatic muscle development	1/49	31/12275	0.11675	0.368954	0.34356	nau	1
GO:0007603	BP	GO:0007603	phototransduction, visible light	1/49	31/12275	0.11675	0.368954	0.34356	ninaC	1
GO:0009743	BP	GO:0009743	response to carbohydrate	1/49	31/12275	0.11675	0.368954	0.34356	Gr43a	1
GO:0014706	BP	GO:0014706	striated muscle tissue development	1/49	31/12275	0.11675	0.368954	0.34356	nau	1
GO:0048867	BP	GO:0048867	stem cell fate determination	1/49	31/12275	0.11675	0.368954	0.34356	mid	1
GO:0006022	BP	GO:0006022	aminoglycan metabolic process	2/49	148/12275	0.117781	0.368954	0.34356	CG43896/Muc11A	2
GO:0097194	BP	GO:0097194	execution phase of apoptosis	1/49	32/12275	0.120285	0.37231	0.346686	CG33346	1
GO:0060537	BP	GO:0060537	muscle tissue development	1/49	34/12275	0.127313	0.389428	0.362625	nau	1
GO:0019637	BP	GO:0019637	organophosphate metabolic process	4/49	488/12275	0.129431	0.391302	0.364371	CG1441/CG13091/CG10097/CG17560	4
GO:0009584	BP	GO:0009584	detection of visible light	1/49	37/12275	0.137752	0.411672	0.383338	ninaC	1
GO:0006726	BP	GO:0006726	eye pigment biosynthetic process	1/49	39/12275	0.144643	0.417857	0.389098	rdhB	1
GO:0016203	BP	GO:0016203	muscle attachment	1/49	39/12275	0.144643	0.417857	0.389098	nau	1
GO:0048865	BP	GO:0048865	stem cell fate commitment	1/49	39/12275	0.144643	0.417857	0.389098	mid	1
GO:0010453	BP	GO:0010453	regulation of cell fate commitment	1/49	40/12275	0.148068	0.418988	0.390151	mid	1
GO:0042441	BP	GO:0042441	eye pigment metabolic process	1/49	41/12275	0.15148	0.418988	0.390151	rdhB	1
GO:0043324	BP	GO:0043324	pigment metabolic process involved in developmental pigmentation	1/49	41/12275	0.15148	0.418988	0.390151	rdhB	1
GO:0043474	BP	GO:0043474	pigment metabolic process involved in pigmentation	1/49	41/12275	0.15148	0.418988	0.390151	rdhB	1
GO:0014016	BP	GO:0014016	neuroblast differentiation	1/49	45/12275	0.164994	0.45122	0.420165	mid	1
GO:0003013	BP	GO:0003013	circulatory system process	1/49	46/12275	0.16834	0.45122	0.420165	mid	1
GO:0003015	BP	GO:0003015	heart process	1/49	46/12275	0.16834	0.45122	0.420165	mid	1
GO:0008039	BP	GO:0008039	synaptic target recognition	1/49	49/12275	0.178298	0.452385	0.421249	CG7179	1
GO:0010037	BP	GO:0010037	response to carbon dioxide	1/49	49/12275	0.178298	0.452385	0.421249	Gr43a	1
GO:0071482	BP	GO:0071482	cellular response to light stimulus	1/49	49/12275	0.178298	0.452385	0.421249	ninaC	1
GO:0050913	BP	GO:0050913	sensory perception of bitter taste	1/49	50/12275	0.181591	0.452385	0.421249	Gr43a	1
GO:0060538	BP	GO:0060538	skeletal muscle organ development	1/49	51/12275	0.184871	0.452385	0.421249	nau	1
GO:0048069	BP	GO:0048069	eye pigmentation	1/49	52/12275	0.188139	0.452385	0.421249	rdhB	1
GO:0040003	BP	GO:0040003	chitin-based cuticle development	2/49	199/12275	0.188412	0.452385	0.421249	Cpr47Ee/Cpr66Cb	2
GO:0000768	BP	GO:0000768	syncytium formation by plasma membrane fusion	1/49	53/12275	0.191393	0.452385	0.421249	nau	1
GO:0006949	BP	GO:0006949	syncytium formation	1/49	53/12275	0.191393	0.452385	0.421249	nau	1
GO:0007520	BP	GO:0007520	myoblast fusion	1/49	53/12275	0.191393	0.452385	0.421249	nau	1
GO:0008406	BP	GO:0008406	gonad development	1/49	53/12275	0.191393	0.452385	0.421249	mid	1
GO:0045137	BP	GO:0045137	development of primary sexual characteristics	1/49	53/12275	0.191393	0.452385	0.421249	mid	1
GO:0140253	BP	GO:0140253	cell-cell fusion	1/49	53/12275	0.191393	0.452385	0.421249	nau	1
GO:0015698	BP	GO:0015698	inorganic anion transport	1/49	54/12275	0.194635	0.453966	0.422721	CG6938	1
GO:0007218	BP	GO:0007218	neuropeptide signaling pathway	1/49	56/12275	0.201081	0.453966	0.422721	Nplp3	1
GO:0014902	BP	GO:0014902	myotube differentiation	1/49	56/12275	0.201081	0.453966	0.422721	nau	1
GO:0048568	BP	GO:0048568	embryonic organ development	1/49	56/12275	0.201081	0.453966	0.422721	mid	1
GO:0006400	BP	GO:0006400	tRNA modification	1/49	57/12275	0.204285	0.453966	0.422721	CG3045	1
GO:0007602	BP	GO:0007602	phototransduction	1/49	57/12275	0.204285	0.453966	0.422721	ninaC	1
GO:0007631	BP	GO:0007631	feeding behavior	1/49	57/12275	0.204285	0.453966	0.422721	Gr43a	1
GO:0001894	BP	GO:0001894	tissue homeostasis	1/49	59/12275	0.210654	0.464154	0.432208	ninaC	1
GO:0009583	BP	GO:0009583	detection of light stimulus	1/49	62/12275	0.220116	0.480925	0.447825	ninaC	1
GO:0007186	BP	GO:0007186	G protein-coupled receptor signaling pathway	2/49	222/12275	0.221979	0.480954	0.447852	ninaC/Nplp3	2
GO:0046148	BP	GO:0046148	pigment biosynthetic process	1/49	64/12275	0.226361	0.486396	0.45292	rdhB	1
GO:0000788	CC	GO:0000788	nuclear nucleosome	5/47	67/11938	6.11657e-06	0.000132191	0.000101816	His2B:CG33906/His2B:CG33872/His2B:CG33880/His2B:CG33896/His2B:CG33894	5
GO:0000786	CC	GO:0000786	nucleosome	6/47	120/11938	6.97747e-06	0.000132191	0.000101816	His2B:CG33906/His2B:CG33872/His2B:CG33880/His1:CG33804/His2B:CG33896/His2B:CG33894	6
GO:0044815	CC	GO:0044815	DNA packaging complex	6/47	127/11938	9.67255e-06	0.000132191	0.000101816	His2B:CG33906/His2B:CG33872/His2B:CG33880/His1:CG33804/His2B:CG33896/His2B:CG33894	6
GO:0032993	CC	GO:0032993	protein-DNA complex	6/47	145/11938	2.06247e-05	0.000211403	0.000162827	His2B:CG33906/His2B:CG33872/His2B:CG33880/His1:CG33804/His2B:CG33896/His2B:CG33894	6
GO:0000790	CC	GO:0000790	nuclear chromatin	6/47	251/11938	0.000424247	0.00347882	0.00267945	His2B:CG33906/His2B:CG33872/His2B:CG33880/His1:CG33804/His2B:CG33896/His2B:CG33894	6
GO:0005777	CC	GO:0005777	peroxisome	4/47	99/11938	0.000603824	0.00353668	0.00272402	CG1441/CG13091/CG10097/CG17560	4
GO:0042579	CC	GO:0042579	microbody	4/47	99/11938	0.000603824	0.00353668	0.00272402	CG1441/CG13091/CG10097/CG17560	4
GO:0044454	CC	GO:0044454	nuclear chromosome part	6/47	316/11938	0.00141168	0.00723487	0.00557243	His2B:CG33906/His2B:CG33872/His2B:CG33880/His1:CG33804/His2B:CG33896/His2B:CG33894	6
GO:0000228	CC	GO:0000228	nuclear chromosome	6/47	346/11938	0.00223567	0.0101847	0.00784446	His2B:CG33906/His2B:CG33872/His2B:CG33880/His1:CG33804/His2B:CG33896/His2B:CG33894	6
GO:0000785	CC	GO:0000785	chromatin	6/47	399/11938	0.00452242	0.0185419	0.0142813	His2B:CG33906/His2B:CG33872/His2B:CG33880/His1:CG33804/His2B:CG33896/His2B:CG33894	6
GO:0016027	CC	GO:0016027	inaD signaling complex	1/47	10/11938	0.0386942	0.144224	0.111084	ninaC	1
GO:0031012	CC	GO:0031012	extracellular matrix	3/47	213/11938	0.0511842	0.174879	0.134695	Cpr47Ee/Cpr66Cb/Muc11A	3
GO:0016459	CC	GO:0016459	myosin complex	1/47	25/11938	0.0940027	0.29647	0.228347	ninaC	1
GO:0016028	CC	GO:0016028	rhabdomere	1/47	36/11938	0.13257	0.388242	0.299031	ninaC	1
GO:0019897	CC	GO:0019897	extrinsic component of plasma membrane	1/47	40/11938	0.146193	0.399594	0.307774	ninaC	1
GO:0080019	MF	GO:0080019	fatty-acyl-CoA reductase (alcohol-forming) activity	4/53	17/12127	7.41856e-07	9.2732e-05	9.2732e-05	CG1441/CG13091/CG10097/CG17560	4
GO:0016620	MF	GO:0016620	oxidoreductase activity, acting on the aldehyde or oxo group of donors, NAD or NADP as acceptor	4/53	34/12127	1.36823e-05	0.000855142	0.000855142	CG1441/CG13091/CG10097/CG17560	4
GO:0016903	MF	GO:0016903	oxidoreductase activity, acting on the aldehyde or oxo group of donors	4/53	45/12127	4.2423e-05	0.00176763	0.00176763	CG1441/CG13091/CG10097/CG17560	4
GO:0046983	MF	GO:0046983	protein dimerization activity	7/53	392/12127	0.00149362	0.0466756	0.0466756	nau/His2B:CG33906/His2B:CG33872/CG6938/His2B:CG33880/His2B:CG33896/His2B:CG33894	7
GO:0046982	MF	GO:0046982	protein heterodimerization activity	5/53	222/12127	0.00276077	0.0690193	0.0690193	His2B:CG33906/His2B:CG33872/His2B:CG33880/His2B:CG33896/His2B:CG33894	5
GO:0042302	MF	GO:0042302	structural constituent of cuticle	3/53	142/12127	0.0240501	0.455714	0.455714	Cpr47Ee/Cpr66Cb/CG15754	3
GO:0099106	MF	GO:0099106	ion channel regulator activity	1/53	12/12127	0.0512252	0.455714	0.455714	CG42541	1
GO:0001228	MF	GO:0001228	DNA-binding transcription activator activity, RNA polymerase II-specific	2/53	88/12127	0.0565237	0.455714	0.455714	nau/mid	2
GO:0001871	MF	GO:0001871	pattern binding	1/53	14/12127	0.0595087	0.455714	0.455714	Sr-CIV	1
GO:0004035	MF	GO:0004035	alkaline phosphatase activity	1/53	14/12127	0.0595087	0.455714	0.455714	Alp2	1
GO:0005044	MF	GO:0005044	scavenger receptor activity	1/53	14/12127	0.0595087	0.455714	0.455714	Sr-CIV	1
GO:0030247	MF	GO:0030247	polysaccharide binding	1/53	14/12127	0.0595087	0.455714	0.455714	Sr-CIV	1
GO:0000014	MF	GO:0000014	single-stranded DNA endodeoxyribonuclease activity	1/53	16/12127	0.0677212	0.455714	0.455714	CG33346	1
GO:0008106	MF	GO:0008106	alcohol dehydrogenase (NADP+) activity	1/53	16/12127	0.0677212	0.455714	0.455714	CG12766	1
GO:0001102	MF	GO:0001102	RNA polymerase II activating transcription factor binding	1/53	17/12127	0.071801	0.455714	0.455714	mid	1
GO:0004033	MF	GO:0004033	aldo-keto reductase (NADP) activity	1/53	17/12127	0.071801	0.455714	0.455714	CG12766	1
GO:0016616	MF	GO:0016616	oxidoreductase activity, acting on the CH-OH group of donors, NAD or NADP as acceptor	2/53	101/12127	0.0719679	0.455714	0.455714	CG12766/rdhB	2
GO:0016866	MF	GO:0016866	intramolecular transferase activity	1/53	18/12127	0.0758633	0.455714	0.455714	CG3045	1
GO:0008010	MF	GO:0008010	structural constituent of chitin-based larval cuticle	2/53	106/12127	0.0782352	0.455714	0.455714	Cpr47Ee/Cpr66Cb	2
GO:0004252	MF	GO:0004252	serine-type endopeptidase activity	3/53	231/12127	0.0798791	0.455714	0.455714	CG30087/CG30090/CG30082	3
GO:0016247	MF	GO:0016247	channel regulator activity	1/53	21/12127	0.0879459	0.455714	0.455714	CG42541	1
GO:0070006	MF	GO:0070006	metalloaminopeptidase activity	1/53	23/12127	0.0959146	0.455714	0.455714	CG11951	1
GO:0008061	MF	GO:0008061	chitin binding	2/53	122/12127	0.0993587	0.455714	0.455714	CG43896/Muc11A	2
GO:0016614	MF	GO:0016614	oxidoreductase activity, acting on CH-OH group of donors	2/53	122/12127	0.0993587	0.455714	0.455714	CG12766/rdhB	2
GO:0008236	MF	GO:0008236	serine-type peptidase activity	3/53	256/12127	0.10106	0.455714	0.455714	CG30087/CG30090/CG30082	3
GO:0017171	MF	GO:0017171	serine hydrolase activity	3/53	257/12127	0.10195	0.455714	0.455714	CG30087/CG30090/CG30082	3
GO:0030246	MF	GO:0030246	carbohydrate binding	2/53	125/12127	0.103483	0.455714	0.455714	CG15765/Sr-CIV	2
GO:0005254	MF	GO:0005254	chloride channel activity	1/53	26/12127	0.10774	0.455714	0.455714	CG6938	1
GO:0033613	MF	GO:0033613	activating transcription factor binding	1/53	26/12127	0.10774	0.455714	0.455714	mid	1
GO:0004529	MF	GO:0004529	exodeoxyribonuclease activity	1/53	28/12127	0.115539	0.455714	0.455714	CG33346	1
GO:0005214	MF	GO:0005214	structural constituent of chitin-based cuticle	2/53	135/12127	0.11756	0.455714	0.455714	Cpr47Ee/Cpr66Cb	2
GO:0005201	MF	GO:0005201	extracellular matrix structural constituent	1/53	30/12127	0.123271	0.455714	0.455714	Muc11A	1
GO:0033041	MF	GO:0033041	sweet taste receptor activity	1/53	30/12127	0.123271	0.455714	0.455714	Gr43a	1
GO:0005253	MF	GO:0005253	anion channel activity	1/53	31/12127	0.127112	0.455714	0.455714	CG6938	1
GO:0005184	MF	GO:0005184	neuropeptide hormone activity	1/53	33/12127	0.134745	0.455714	0.455714	Nplp3	1
GO:0016830	MF	GO:0016830	carbon-carbon lyase activity	1/53	33/12127	0.134745	0.455714	0.455714	Cyp4g1	1
GO:0004520	MF	GO:0004520	endodeoxyribonuclease activity	1/53	34/12127	0.138537	0.455714	0.455714	CG33346	1
GO:0004713	MF	GO:0004713	protein tyrosine kinase activity	1/53	34/12127	0.138537	0.455714	0.455714	ninaC	1
GO:0005516	MF	GO:0005516	calmodulin binding	1/53	36/12127	0.146072	0.456474	0.456474	ninaC	1
GO:0038024	MF	GO:0038024	cargo receptor activity	1/53	36/12127	0.146072	0.456474	0.456474	Sr-CIV	1
GO:0015108	MF	GO:0015108	chloride transmembrane transporter activity	1/53	37/12127	0.149815	0.456753	0.456753	CG6938	1
