# Supplementary material for: Association of Wolbachia with gene expression in Drosophila testes
Source: Research Square preprint supplement (doi:10.21203/rs.3.rs-188597/v1), 2021-02-09
Supplement: Supplementary file 2 [file 61a724405cf880ae292783cf.xlsx]

## Sheet: output
Contig	Match	Locus	Allele	Differences	ST	strain	supergroup	host genus	host species
coxA	exact	coxA	1		1	Dmel_A_wMel	A	Drosophila	melanogaster
fbpA-F-R	exact	fbpA	1
ftsZ	exact	ftsZ	1
gatB	exact	gatB	1
hcpA	exact	hcpA	1
