# Supplementary material for: Association of Wolbachia with gene expression in Drosophila testes
Source: Research Square preprint supplement (doi:10.21203/rs.3.rs-188597/v1), 2021-02-09
Supplement: Supplementary file 3 [file f2322f7bbcb6aa1cb5a83274.xlsx]

## Sheet: Lipid metabolism
Block Type	96well
Chemistry	SYBR_GREEN
Instrument Type	steponeplus
Passive Reference	ROX
Well	Sample Name	Target Name	Task	Reporter	Quencher	RQ	RQ Min	RQ Max	Cт	Cт Mean	Cт SD	ΔCт	ΔCт Mean	ΔCт SE	HK Control ΔCт Mean	HK Control ΔCт SE	ΔΔCт	Automatic Ct Threshold	Ct Threshold	Automatic Baseline	Baseline Start	Baseline End	Efficiency	Tm1	Tm2	Tm3	Comments	EXPFAIL	MTP
A3	DmelT	Mag	UNKNOWN	SYBR	None	1	0.801413	1.2478	30.6198	30.8226	0.175688		13.4544	0.115033			0	TRUE	1.1304	TRUE	3	24	1	86.9021				N	N
A4	DmelT	CG10116	UNKNOWN	SYBR	None	1	0.815568	1.22614	30.7711	30.7686	0.157592		13.4003	0.105935			0	TRUE	1.3419	TRUE	3	23	1	89.4376				N	N
A7	DmelT	CG10097	UNKNOWN	SYBR	None	1	0.649575	1.53947	33.6568	33.5896	0.376752		16.2213	0.224183			0	TRUE	1.39963	TRUE	3	26	1	84.8141				N	N
A9	DmelT	RP49	UNKNOWN	SYBR	None				17.2657	17.3682	0.0939759							TRUE	1.3188	TRUE	3	10	1	89.5855				N	N
B1	DmelT	Acox57D	UNKNOWN	SYBR	None	1	0.826222	1.21033	28.1937	28.0285	0.143823		10.6603	0.0991912			0	TRUE	1.41211	TRUE	3	20	1	88.0933				N	N
B3	DmelT	Mag	UNKNOWN	SYBR	None	1	0.801413	1.2478	30.9227	30.8226	0.175688		13.4544	0.115033			0	TRUE	1.1304	TRUE	3	24	1	86.9021				N	N
B4	DmelT	CG10116	UNKNOWN	SYBR	None	1	0.815568	1.22614	30.6097	30.7686	0.157592		13.4003	0.105935			0	TRUE	1.3419	TRUE	3	24	1	89.2885				N	N
B7	DmelT	CG10097	UNKNOWN	SYBR	None	1	0.649575	1.53947	33.1837	33.5896	0.376752		16.2213	0.224183			0	TRUE	1.39963	TRUE	3	26	1	84.8141				N	N
B9	DmelT	RP49	UNKNOWN	SYBR	None				17.4503	17.3682	0.0939759							TRUE	1.3188	TRUE	3	11	1	89.5855				N	N
C1	DmelT	Acox57D	UNKNOWN	SYBR	None	1	0.826222	1.21033	27.9314	28.0285	0.143823		10.6603	0.0991912			0	TRUE	1.41211	TRUE	3	20	1	88.0933				N	N
C3	DmelT	Mag	UNKNOWN	SYBR	None	1	0.801413	1.2478	30.9255	30.8226	0.175688		13.4544	0.115033			0	TRUE	1.1304	TRUE	3	24	1	86.753				N	N
C4	DmelT	CG10116	UNKNOWN	SYBR	None	1	0.815568	1.22614	30.9249	30.7686	0.157592		13.4003	0.105935			0	TRUE	1.3419	TRUE	3	23	1	89.1393				N	N
C7	DmelT	CG10097	UNKNOWN	SYBR	None	1	0.649575	1.53947	33.9282	33.5896	0.376752		16.2213	0.224183			0	TRUE	1.39963	TRUE	3	27	1	84.8141				N	N
C9	DmelT	RP49	UNKNOWN	SYBR	None				17.3887	17.3682	0.0939759							TRUE	1.3188	TRUE	3	10	1	89.4364				N	N
D1	DmelW	Acox57D	UNKNOWN	SYBR	None	1.11852	1.03113	1.21333	27.3365	27.4113	0.0710093		10.4987	0.042274			-0.161596	TRUE	1.41211	TRUE	3	20	1	87.9441				N	N
D3	DmelW	Mag	UNKNOWN	SYBR	None	13.0268	9.67782	17.5346	26.4371	26.6636	0.266859		9.75099	0.154416			-3.70341	TRUE	1.1304	TRUE	3	20	1	86.753				N	N
D4	DmelW	CG10116	UNKNOWN	SYBR	None	67.9184	55.9015	82.5184	24.1339	24.2272	0.174333		7.31462	0.101178			-6.08573	TRUE	1.3419	TRUE	3	17	1	89.2885				N	N
D7	DmelW	CG10097	UNKNOWN	SYBR	None	1.90075	1.28895	2.80296	32.3031	32.2074	0.349129		15.2948	0.201833			-0.926572	TRUE	1.39963	TRUE	3	24	1	84.8141				N	N
D9	DmelW	RP49	UNKNOWN	SYBR	None				16.8972	16.9126	0.0178594							TRUE	1.3188	TRUE	3	10	1	89.4364				N	N
E1	DmelW	Acox57D	UNKNOWN	SYBR	None	1.11852	1.03113	1.21333	27.4778	27.4113	0.0710093		10.4987	0.042274			-0.161596	TRUE	1.41211	TRUE	3	19	1	87.9441				N	N
E3	DmelW	Mag	UNKNOWN	SYBR	None	13.0268	9.67782	17.5346	26.5959	26.6636	0.266859		9.75099	0.154416			-3.70341	TRUE	1.1304	TRUE	3	20	1	86.753				N	N
E4	DmelW	CG10116	UNKNOWN	SYBR	None	67.9184	55.9015	82.5184	24.1194	24.2272	0.174333		7.31462	0.101178			-6.08573	TRUE	1.3419	TRUE	3	17	1	89.2885				N	N
E7	DmelW	CG10097	UNKNOWN	SYBR	None	1.90075	1.28895	2.80296	32.4986	32.2074	0.349129		15.2948	0.201833			-0.926572	TRUE	1.39963	TRUE	3	25	1	84.8141				N	N
E9	DmelW	RP49	UNKNOWN	SYBR	None				16.9084	16.9126	0.0178594							TRUE	1.3188	TRUE	3	10	1	89.4364				N	N
F1	DmelW	Acox57D	UNKNOWN	SYBR	None	1.11852	1.03113	1.21333	27.4196	27.4113	0.0710093		10.4987	0.042274			-0.161596	TRUE	1.41211	TRUE	3	19	1	88.0933				N	N
F3	DmelW	Mag	UNKNOWN	SYBR	None	13.0268	9.67782	17.5346	26.9578	26.6636	0.266859		9.75099	0.154416			-3.70341	TRUE	1.1304	TRUE	3	20	1	86.753				N	N
F4	DmelW	CG10116	UNKNOWN	SYBR	None	67.9184	55.9015	82.5184	24.4283	24.2272	0.174333		7.31462	0.101178			-6.08573	TRUE	1.3419	TRUE	3	16	1	89.2885				N	N
F7	DmelW	CG10097	UNKNOWN	SYBR	None	1.90075	1.28895	2.80296	31.8203	32.2074	0.349129		15.2948	0.201833			-0.926572	TRUE	1.39963	TRUE	3	24	1	84.8141				N	N
F9	DmelW	RP49	UNKNOWN	SYBR	None				16.9322	16.9126	0.0178594							TRUE	1.3188	TRUE	3	10	1	89.4364				N	N
G1		Acox57D	NTC	SYBR	None				Undetermined									TRUE	1.41211	TRUE	3	39	1	61.5452				Y	N
G3		Mag	NTC	SYBR	None				Undetermined									TRUE	1.1304	TRUE	3	39	1	75.7162	85.4107			Y	Y
G4		CG10116	NTC	SYBR	None				Undetermined									TRUE	1.3419	TRUE	3	39	1	62.2931	91.9731	78.8483		Y	Y
G7		CG10097	NTC	SYBR	None				Undetermined									TRUE	1.39963	TRUE	3	39	1	61.6918	82.4273			Y	Y
G9		RP49	NTC	SYBR	None				Undetermined									TRUE	1.3188	TRUE	3	39	1	84.5135	61.5403	76.9055		Y	Y
Analysis Type	Singleplex
Endogenous Control	RP49
RQ Min/Max Confidence Level	95.0
Reference Sample	DmelT

## Sheet: Lysosome
Block Type	96well
Chemistry	SYBR_GREEN
Instrument Type	steponeplus
Passive Reference	ROX
Well	Sample Name	Target Name	Task	Reporter	Quencher	RQ	RQ Min	RQ Max	Cт	Cт Mean	Cт SD	ΔCт	ΔCт Mean	ΔCт SE	HK Control ΔCт Mean	HK Control ΔCт SE	ΔΔCт	Automatic Ct Threshold	Ct Threshold	Automatic Baseline	Baseline Start	Baseline End	Efficiency	Tm1	Tm2	Tm3	Comments	HIGHSD	EXPFAIL	MTP
A1	DmelT	LManII	UNKNOWN	SYBR	None	1	0.874629	1.14334	25.8231	25.9025	0.069275		8.65971	0.0696058			0	TRUE	1.30583	TRUE	3	18	1	84.527				N	N	N
A2	DmelT	LManVI	UNKNOWN	SYBR	None	1	0.862468	1.15946	25.8063	25.9055	0.089422		8.66274	0.0768812			0	TRUE	1.25163	TRUE	3	18	1	84.9742				N	N	N
A5	DmelT	RP49	UNKNOWN	SYBR	None				17.2385	17.2428	0.0986706							TRUE	1.08217	TRUE	3	11	1	89.4454				N	N	N
B1	DmelT	LManII	UNKNOWN	SYBR	None	1	0.874629	1.14334	25.9337	25.9025	0.069275		8.65971	0.0696058			0	TRUE	1.30583	TRUE	3	19	1	84.527				N	N	N
B2	DmelT	LManVI	UNKNOWN	SYBR	None	1	0.862468	1.15946	25.9799	25.9055	0.089422		8.66274	0.0768812			0	TRUE	1.25163	TRUE	3	19	1	84.8252				N	N	N
B5	DmelT	RP49	UNKNOWN	SYBR	None				17.3436	17.2428	0.0986706							TRUE	1.08217	TRUE	3	10	1	89.2963				N	N	N
C1	DmelT	LManII	UNKNOWN	SYBR	None	1	0.874629	1.14334	25.9507	25.9025	0.069275		8.65971	0.0696058			0	TRUE	1.30583	TRUE	3	18	1	84.527				N	N	N
C2	DmelT	LManVI	UNKNOWN	SYBR	None	1	0.862468	1.15946	25.9304	25.9055	0.089422		8.66274	0.0768812			0	TRUE	1.25163	TRUE	3	18	1	84.8252				N	N	N
C5	DmelT	RP49	UNKNOWN	SYBR	None				17.1464	17.2428	0.0986706							TRUE	1.08217	TRUE	3	11	1	89.2963				N	N	N
D1	DmelW	LManII	UNKNOWN	SYBR	None	1.61161	0.803523	3.23237	25.4575	25.2144	0.211677		7.97121	0.361646			-0.688501	TRUE	1.30583	TRUE	3	18	1	84.378				N	N	N
D2	DmelW	LManVI	UNKNOWN	SYBR	None	1.6044	0.810991	3.174	25.1069	25.2239	0.171675		7.98071	0.354508			-0.682031	TRUE	1.25163	TRUE	3	18	1	84.8252				N	N	N
D5	DmelW	RP49	UNKNOWN	SYBR	None				16.9776	17.2432	0.589539							TRUE	1.08217	TRUE	3	9	1	89.1472				Y	N	N
E1	DmelW	LManII	UNKNOWN	SYBR	None	1.61161	0.803523	3.23237	25.1144	25.2144	0.211677		7.97121	0.361646			-0.688501	TRUE	1.30583	TRUE	3	18	1	84.378				N	N	N
E2	DmelW	LManVI	UNKNOWN	SYBR	None	1.6044	0.810991	3.174	25.1437	25.2239	0.171675		7.98071	0.354508			-0.682031	TRUE	1.25163	TRUE	3	17	1	84.8252				N	N	N
E5	DmelW	RP49	UNKNOWN	SYBR	None				17.9188	17.2432	0.589539							TRUE	1.08217	TRUE	3	8	1	89.1472				Y	N	N
F1	DmelW	LManII	UNKNOWN	SYBR	None	1.61161	0.803523	3.23237	25.0711	25.2144	0.211677		7.97121	0.361646			-0.688501	TRUE	1.30583	TRUE	3	17	1	84.378				N	N	N
F2	DmelW	LManVI	UNKNOWN	SYBR	None	1.6044	0.810991	3.174	25.421	25.2239	0.171675		7.98071	0.354508			-0.682031	TRUE	1.25163	TRUE	3	18	1	84.8252				N	N	N
F5	DmelW	RP49	UNKNOWN	SYBR	None				16.8331	17.2432	0.589539							TRUE	1.08217	TRUE	3	10	1	89.2963				Y	N	N
G1		LManII	NTC	SYBR	None				Undetermined									TRUE	1.30583	TRUE	3	39	1	92.8745	61.5716	87.9554		N	Y	Y
G2		LManVI	NTC	SYBR	None				Undetermined									TRUE	1.25163	TRUE	3	39	1	61.5716	93.7688			N	Y	Y
G5		RP49	NTC	SYBR	None				Undetermined									TRUE	1.08217	TRUE	3	39	1	61.7158	89.4454			N	Y	Y
Analysis Type	Singleplex
Endogenous Control	RP49
RQ Min/Max Confidence Level	95.0
Reference Sample	DmelT

## Sheet: vha100-5
Block Type	96well
Chemistry	SYBR_GREEN
Instrument Type	steponeplus
Passive Reference	ROX
Well	Sample Name	Target Name	Task	Reporter	Quencher	RQ	RQ Min	RQ Max	Cт	Cт Mean	Cт SD	ΔCт	ΔCт Mean	ΔCт SE	HK Control ΔCт Mean	HK Control ΔCт SE	ΔΔCт	Automatic Ct Threshold	Ct Threshold	Automatic Baseline	Baseline Start	Baseline End	Efficiency	Tm1	Tm2	Tm3	Comments	MTP
A4	DmelTM	vha100-5	UNKNOWN	SYBR	None	1	0.852614	1.17286	24.4655	24.4278	0.0967664		7.7625	0.0828525			0	TRUE	1.16837	TRUE	3	17	1	81.9878				N
A7	DmelTM	RP49	UNKNOWN	SYBR	None				16.7202	16.6653	0.105971							TRUE	1.61696	TRUE	3	9	1	89.4517				N
B4	DmelTM	vha100-5	UNKNOWN	SYBR	None	1	0.852614	1.17286	24.3179	24.4278	0.0967664		7.7625	0.0828525			0	TRUE	1.16837	TRUE	3	17	1	81.8386				N
B7	DmelTM	RP49	UNKNOWN	SYBR	None				16.7326	16.6653	0.105971							TRUE	1.61696	TRUE	3	10	1	89.3025				N
C4	DmelTM	vha100-5	UNKNOWN	SYBR	None	1	0.852614	1.17286	24.5001	24.4278	0.0967664		7.7625	0.0828525			0	TRUE	1.16837	TRUE	3	17	1	81.8386				N
C7	DmelTM	RP49	UNKNOWN	SYBR	None				16.5432	16.6653	0.105971							TRUE	1.61696	TRUE	3	9	1	89.3025				N
D4	DmelWM	vha100-5	UNKNOWN	SYBR	None	1.78899	1.43177	2.23533	23.9111	23.7213	0.167672		6.92335	0.115739			-0.839148	TRUE	1.16837	TRUE	3	17	1	82.2862				N
D7	DmelWM	RP49	UNKNOWN	SYBR	None				16.7511	16.798	0.109876							TRUE	1.61696	TRUE	3	9	1	89.3025				N
E4	DmelWM	vha100-5	UNKNOWN	SYBR	None	1.78899	1.43177	2.23533	23.6599	23.7213	0.167672		6.92335	0.115739			-0.839148	TRUE	1.16837	TRUE	3	16	1	82.2862				N
E7	DmelWM	RP49	UNKNOWN	SYBR	None				16.9235	16.798	0.109876							TRUE	1.61696	TRUE	3	9	1	89.3025				N
F4	DmelWM	vha100-5	UNKNOWN	SYBR	None	1.78899	1.43177	2.23533	23.593	23.7213	0.167672		6.92335	0.115739			-0.839148	TRUE	1.16837	TRUE	3	16	1	82.2862				N
F7	DmelWM	RP49	UNKNOWN	SYBR	None				16.7193	16.798	0.109876							TRUE	1.61696	TRUE	3	9	1	89.3025				N
G4		vha100-5	NTC	SYBR	None				Undetermined									TRUE	1.16837	TRUE	3	39	1	61.3965	76.6162			Y
G7		RP49	NTC	SYBR	None				Undetermined									TRUE	1.61696	TRUE	3	39	1	61.7022	92.7339			Y
Analysis Type	Singleplex
Endogenous Control	RP49
RQ Min/Max Confidence Level	95.0
Reference Sample	DmelTM

## Sheet: Immune
Block Type	96well
Chemistry	SYBR_GREEN
Instrument Type	steponeplus
Passive Reference	ROX
Well	Sample Name	Target Name	Task	Reporter	Quencher	RQ	RQ Min	RQ Max	Cт	Cт Mean	Cт SD	ΔCт	ΔCт Mean	ΔCт SE	HK Control ΔCт Mean	HK Control ΔCт SE	ΔΔCт	Automatic Ct Threshold	Ct Threshold	Automatic Baseline	Baseline Start	Baseline End	Efficiency	Tm1	Tm2	Tm3	Comments	EXPFAIL	THOLDFAIL	MTP
A3	DmelT	spheriode	UNKNOWN	SYBR	None	1	0.689199	1.45096	31.7134	32.0305	0.295912		14.1542	0.193416			0	TRUE	1.26538	TRUE	3	24	1	90.0414				N	N	N
A6	DmelT	PGRPsc2	UNKNOWN	SYBR	None	1	0.595254	1.67996	28.9443	28.7887	0.439688		10.9125	0.269562			0	TRUE	1.30599	TRUE	3	22	1	89.2967				N	N	N
A7	DmelT	DptB	UNKNOWN	SYBR	None	1	0.831049	1.2033	30.9269	30.8823	0.0554767		13.0061	0.0961641			0	TRUE	1.93861	TRUE	3	23	1	86.1699				N	N	N
A8	DmelT	RP49	UNKNOWN	SYBR	None				17.9271	17.8763	0.157051							TRUE	1.28895	TRUE	3	11	1	89.3006				N	N	N
B3	DmelT	spheriode	UNKNOWN	SYBR	None	1	0.689199	1.45096	32.2994	32.0305	0.295912		14.1542	0.193416			0	TRUE	1.26538	TRUE	3	24	1	90.0414				N	N	N
B6	DmelT	PGRPsc2	UNKNOWN	SYBR	None	1	0.595254	1.67996	29.1295	28.7887	0.439688		10.9125	0.269562			0	TRUE	1.30599	TRUE	3	21	1	89.2967				N	N	N
B7	DmelT	DptB	UNKNOWN	SYBR	None	1	0.831049	1.2033	30.8999	30.8823	0.0554767		13.0061	0.0961641			0	TRUE	1.93861	TRUE	3	23	1	86.1699				N	N	N
B8	DmelT	RP49	UNKNOWN	SYBR	None				18.0016	17.8763	0.157051							TRUE	1.28895	TRUE	3	11	1	89.3006				N	N	N
C3	DmelT	spheriode	UNKNOWN	SYBR	None	1	0.689199	1.45096	32.0786	32.0305	0.295912		14.1542	0.193416			0	TRUE	1.26538	TRUE	3	24	1	89.8924				N	N	N
C6	DmelT	PGRPsc2	UNKNOWN	SYBR	None	1	0.595254	1.67996	28.2924	28.7887	0.439688		10.9125	0.269562			0	TRUE	1.30599	TRUE	3	21	1	89.2967				N	N	N
C7	DmelT	DptB	UNKNOWN	SYBR	None	1	0.831049	1.2033	30.8202	30.8823	0.0554767		13.0061	0.0961641			0	TRUE	1.93861	TRUE	3	22	1	86.1699				N	N	N
C8	DmelT	RP49	UNKNOWN	SYBR	None				17.7001	17.8763	0.157051							TRUE	1.28895	TRUE	3	11	1	89.3006				N	N	N
D3	DmelW	spheriode	UNKNOWN	SYBR	None	110.23	81.4135	149.246	24.9157	24.6217	0.254925		7.36983	0.157459			-6.78437	TRUE	1.26538	TRUE	3	18	1	90.1905				N	N	N
D6	DmelW	PGRPsc2	UNKNOWN	SYBR	None	4.15769	3.37547	5.12116	25.93	26.1085	0.160604		8.8567	0.108301			-2.05578	TRUE	1.30599	TRUE	3	19	1	89.1476				N	N	N
D7	DmelW	DptB	UNKNOWN	SYBR	None	23.3158	19.7847	27.4771	25.8322	25.7147	0.111586		8.46282	0.0853324			-4.54324	TRUE	1.93861	TRUE	3	17	1	86.1699				N	N	N
D8	DmelW	RP49	UNKNOWN	SYBR	None				17.2135	17.2518	0.0969202							TRUE	1.28895	TRUE	3	10	1	89.3006				N	N	N
E3	DmelW	spheriode	UNKNOWN	SYBR	None	110.23	81.4135	149.246	24.4629	24.6217	0.254925		7.36983	0.157459			-6.78437	TRUE	1.26538	TRUE	3	16	1	90.1905				N	N	N
E6	DmelW	PGRPsc2	UNKNOWN	SYBR	None	4.15769	3.37547	5.12116	26.1544	26.1085	0.160604		8.8567	0.108301			-2.05578	TRUE	1.30599	TRUE	3	19	1	89.1476				N	N	N
E7	DmelW	DptB	UNKNOWN	SYBR	None	23.3158	19.7847	27.4771	25.7016	25.7147	0.111586		8.46282	0.0853324			-4.54324	TRUE	1.93861	TRUE	3	17	1	86.1699				N	N	N
E8	DmelW	RP49	UNKNOWN	SYBR	None				17.1799	17.2518	0.0969202							TRUE	1.28895	TRUE	3	10	1	89.3006				N	N	N
F3	DmelW	spheriode	UNKNOWN	SYBR	None	110.23	81.4135	149.246	24.4864	24.6217	0.254925		7.36983	0.157459			-6.78437	TRUE	1.26538	TRUE	3	17	1	90.1905				N	N	N
F6	DmelW	PGRPsc2	UNKNOWN	SYBR	None	4.15769	3.37547	5.12116	26.2412	26.1085	0.160604		8.8567	0.108301			-2.05578	TRUE	1.30599	TRUE	3	19	1	89.2967				N	N	N
F7	DmelW	DptB	UNKNOWN	SYBR	None	23.3158	19.7847	27.4771	25.6102	25.7147	0.111586		8.46282	0.0853324			-4.54324	TRUE	1.93861	TRUE	3	18	1	86.1699				N	N	N
F8	DmelW	RP49	UNKNOWN	SYBR	None				17.3621	17.2518	0.0969202							TRUE	1.28895	TRUE	3	10	1	89.3006				N	N	N
G3		spheriode	NTC	SYBR	None				Undetermined									TRUE	1.26538	TRUE	3	39	1	93.1718	61.5698	85.2713		Y	N	Y
G6		PGRPsc2	NTC	SYBR	None				Undetermined									TRUE	1.30599	TRUE	3	39	1	61.5661	88.104			Y	N	Y
G7		DptB	NTC	SYBR	None				Undetermined									TRUE	1.93861	TRUE	3	39	1	61.5718	88.5552	91.8349		Y	N	Y
G8		RP49	NTC	SYBR	None				Undetermined									TRUE	1.28895	TRUE	3	39	1	62.0191	92.8785	84.6791		Y	N	Y
Analysis Type	Singleplex
Endogenous Control	RP49
RQ Min/Max Confidence Level	95.0
Reference Sample	DmelT

## Sheet: GstE10-GstE9
Block Type	96well
Chemistry	SYBR_GREEN
Instrument Type	steponeplus
Passive Reference	ROX
Well	Sample Name	Target Name	Task	Reporter	Quencher	RQ	RQ Min	RQ Max	Cт	Cт Mean	Cт SD	ΔCт	ΔCт Mean	ΔCт SE	HK Control ΔCт Mean	HK Control ΔCт SE	ΔΔCт	Automatic Ct Threshold	Ct Threshold	Automatic Baseline	Baseline Start	Baseline End	Efficiency	Tm1	Tm2	Tm3	Comments	EXPFAIL	MTP
A1	DmelT	GstE10	UNKNOWN	SYBR	None	1	0.822835	1.21531	18.3627	18.5032	0.175309		-7.42305	0.101325			0	TRUE	1.51452	TRUE	3	11	1	89.452				N	N
A2	DmelT	GstD9	UNKNOWN	SYBR	None	1	0.929914	1.07537	26.4844	26.4244	0.0648798		0.498203	0.0377572			0	TRUE	1.44472	TRUE	3	19	1	85.2763				N	N
A3	DmelT	RP49	UNKNOWN	SYBR	None				25.9174	25.9262	0.00821165							TRUE	0.970005	TRUE	3	19	1	82.1473				N	N
B1	DmelT	GstE10	UNKNOWN	SYBR	None	1	0.822835	1.21531	18.4472	18.5032	0.175309		-7.42305	0.101325			0	TRUE	1.51452	TRUE	3	12	1	89.452				N	N
B2	DmelT	GstD9	UNKNOWN	SYBR	None	1	0.929914	1.07537	26.3556	26.4244	0.0648798		0.498203	0.0377572			0	TRUE	1.44472	TRUE	3	19	1	85.2763				N	N
B3	DmelT	RP49	UNKNOWN	SYBR	None				25.9276	25.9262	0.00821165							TRUE	0.970005	TRUE	3	19	1	82.1473				N	N
C1	DmelT	GstE10	UNKNOWN	SYBR	None	1	0.822835	1.21531	18.6996	18.5032	0.175309		-7.42305	0.101325			0	TRUE	1.51452	TRUE	3	11	1	89.3029				N	N
C2	DmelT	GstD9	UNKNOWN	SYBR	None	1	0.929914	1.07537	26.4333	26.4244	0.0648798		0.498203	0.0377572			0	TRUE	1.44472	TRUE	3	19	1	85.1272				N	N
C3	DmelT	RP49	UNKNOWN	SYBR	None				25.9337	25.9262	0.00821165							TRUE	0.970005	TRUE	3	19	1	81.9982				N	N
D1	DmelW	GstE10	UNKNOWN	SYBR	None	0.64303	0.590828	0.699845	17.8769	17.907	0.0266008		-6.78601	0.0439945			0.637042	TRUE	1.51452	TRUE	3	10	1	89.3029				N	N
D2	DmelW	GstD9	UNKNOWN	SYBR	None	1.128	0.782873	1.62528	24.9212	25.0174	0.320864		0.324432	0.189783			-0.173771	TRUE	1.44472	TRUE	3	16	1	85.1272				N	N
D3	DmelW	RP49	UNKNOWN	SYBR	None				24.7104	24.693	0.0714068							TRUE	0.970005	TRUE	3	18	1	81.9982				N	N
E1	DmelW	GstE10	UNKNOWN	SYBR	None	0.64303	0.590828	0.699845	17.9274	17.907	0.0266008		-6.78601	0.0439945			0.637042	TRUE	1.51452	TRUE	3	11	1	89.3029				N	N
E2	DmelW	GstD9	UNKNOWN	SYBR	None	1.128	0.782873	1.62528	24.7557	25.0174	0.320864		0.324432	0.189783			-0.173771	TRUE	1.44472	TRUE	3	16	1	85.1272				N	N
E3	DmelW	RP49	UNKNOWN	SYBR	None				24.7541	24.693	0.0714068							TRUE	0.970005	TRUE	3	18	1	81.9982				N	N
F1	DmelW	GstE10	UNKNOWN	SYBR	None	0.64303	0.590828	0.699845	17.9167	17.907	0.0266008		-6.78601	0.0439945			0.637042	TRUE	1.51452	TRUE	3	11	1	89.3029				N	N
F2	DmelW	GstD9	UNKNOWN	SYBR	None	1.128	0.782873	1.62528	25.3754	25.0174	0.320864		0.324432	0.189783			-0.173771	TRUE	1.44472	TRUE	3	18	1	85.1272				N	N
F3	DmelW	RP49	NTC	SYBR	None				24.6145	24.693	0.0714068							TRUE	0.970005	TRUE	3	18	1	81.9982				N	N
G1		GstE10	NTC	SYBR	None				Undetermined									TRUE	1.51452	TRUE	3	39	1	61.7134	81.548	87.6624		Y	Y
G2		GstD9	NTC	SYBR	None				Undetermined									TRUE	1.44472	TRUE	3	39	1	61.4152				Y	N
G3		RP49	NTC	SYBR	None				Undetermined									TRUE	0.970005	TRUE	3	39	1	61.7206	92.7334	88.7077		Y	Y
Analysis Type	Singleplex
Endogenous Control	RP49
RQ Min/Max Confidence Level	95.0
Reference Sample	DmelT

## Sheet: clesterol and Immune
Block Type	96well
Chemistry	SYBR_GREEN
Instrument Type	steponeplus
Passive Reference	ROX
Well	Sample Name	Target Name	Task	Reporter	Quencher	RQ	RQ Min	RQ Max	Cт	Cт Mean	Cт SD	ΔCт	ΔCт Mean	ΔCт SE	HK Control ΔCт Mean	HK Control ΔCт SE	ΔΔCт	Automatic Ct Threshold	Ct Threshold	Automatic Baseline	Baseline Start	Baseline End	Efficiency	Tm1	Tm2	Tm3	Comments	HIGHSD	EXPFAIL	MTP
A1	DmelW	Drsl3	UNKNOWN	SYBR	None	2.34134	2.07052	2.64759	23.408	23.3207	0.110612		6.3817	0.0638745			-1.22733	TRUE	0.699633	TRUE	3	17	1	86.3213				N	N	N
A3	DmelW	Takl1	UNKNOWN	SYBR	None	104.879	85.2981	128.954	25.4671	25.3543	0.185977		8.41531	0.107381			-6.71258	TRUE	1.26465	TRUE	3	18	1	82.745				N	N	N
A4	DmelW	CG8834	UNKNOWN	SYBR	None	12.0414	10.7034	13.5468	18.935	18.8192	0.105996		1.8802	0.0612097			-3.58994	TRUE	0.242103	TRUE	3	15	1	90.1968				N	N	N
A5	DmelW	Npc2d	UNKNOWN	SYBR	None	52.1757	47.6876	57.0862	20.7974	20.8877	0.0809221		3.94869	0.0467375			-5.70531	TRUE	1.15692	TRUE	3	14	1	83.9351				N	N	N
A6	DmelW	Npc2f	UNKNOWN	SYBR	None	6.45834	6.18189	6.74716	22.9273	22.8914	0.0393132		5.95238	0.0227327			-2.69116	TRUE	1.50607	TRUE	3	16	1	84.6803				N	N	N
A7	DmelW	RP49	UNKNOWN	SYBR	None				16.9387	16.939	0.00219184							TRUE	1.22155	TRUE	3	10	1	89.3059				N	N	N
B1	DmelW	Drsl3	UNKNOWN	SYBR	None	2.34134	2.07052	2.64759	23.3578	23.3207	0.110612		6.3817	0.0638745			-1.22733	TRUE	0.699633	TRUE	3	17	1	86.3213				N	N	N
B3	DmelW	Takl1	UNKNOWN	SYBR	None	104.879	85.2981	128.954	25.4562	25.3543	0.185977		8.41531	0.107381			-6.71258	TRUE	1.26465	TRUE	3	19	1	82.745				N	N	N
B4	DmelW	CG8834	UNKNOWN	SYBR	None	12.0414	10.7034	13.5468	18.7269	18.8192	0.105996		1.8802	0.0612097			-3.58994	TRUE	0.242103	TRUE	3	14	1	90.0477				N	N	N
B5	DmelW	Npc2d	UNKNOWN	SYBR	None	52.1757	47.6876	57.0862	20.9537	20.8877	0.0809221		3.94869	0.0467375			-5.70531	TRUE	1.15692	TRUE	3	14	1	83.786				N	N	N
B6	DmelW	Npc2f	UNKNOWN	SYBR	None	6.45834	6.18189	6.74716	22.8974	22.8914	0.0393132		5.95238	0.0227327			-2.69116	TRUE	1.50607	TRUE	3	16	1	84.6803				N	N	N
B7	DmelW	RP49	UNKNOWN	SYBR	None				16.937	16.939	0.00219184							TRUE	1.22155	TRUE	3	10	1	89.1568				N	N	N
C1	DmelW	Drsl3	UNKNOWN	SYBR	None	2.34134	2.07052	2.64759	23.1963	23.3207	0.110612		6.3817	0.0638745			-1.22733	TRUE	0.699633	TRUE	3	17	1	86.3213				N	N	N
C3	DmelW	Takl1	UNKNOWN	SYBR	None	104.879	85.2981	128.954	25.1396	25.3543	0.185977		8.41531	0.107381			-6.71258	TRUE	1.26465	TRUE	3	18	1	82.745				N	N	N
C4	DmelW	CG8834	UNKNOWN	SYBR	None	12.0414	10.7034	13.5468	18.7956	18.8192	0.105996		1.8802	0.0612097			-3.58994	TRUE	0.242103	TRUE	3	14	1	90.0477				N	N	N
C5	DmelW	Npc2d	UNKNOWN	SYBR	None	52.1757	47.6876	57.0862	20.912	20.8877	0.0809221		3.94869	0.0467375			-5.70531	TRUE	1.15692	TRUE	3	15	1	83.786				N	N	N
C6	DmelW	Npc2f	UNKNOWN	SYBR	None	6.45834	6.18189	6.74716	22.8494	22.8914	0.0393132		5.95238	0.0227327			-2.69116	TRUE	1.50607	TRUE	3	16	1	84.6803				N	N	N
C7	DmelW	RP49	UNKNOWN	SYBR	None				16.9413	16.939	0.00219184							TRUE	1.22155	TRUE	3	10	1	89.1568				N	N	N
D1	DmelT	Drsl3	UNKNOWN	SYBR	None	1	0.796283	1.25584	24.9547	24.8042	0.154985		7.60904	0.11837			0	TRUE	0.699633	TRUE	3	18	1	86.3213				N	N	N
D3	DmelT	Takl1	UNKNOWN	SYBR	None	1	0.648491	1.54204	32.5486	32.323	0.365964		15.1279	0.225051			0	TRUE	1.26465	TRUE	3	25	1	82.4469				N	N	N
D4	DmelT	CG8834	UNKNOWN	SYBR	None	1	0.860846	1.16165	22.6746	22.6653	0.0131317		5.47013	0.0778596			0	TRUE	0.242103	TRUE	3	18	1	90.0477				N	N	N
D5	DmelT	Npc2d	UNKNOWN	SYBR	None	1	0.846944	1.18072	26.9252	26.8492	0.0658738		9.654	0.0863197			0	TRUE	1.15692	TRUE	3	20	1	83.637				N	N	N
D6	DmelT	Npc2f	UNKNOWN	SYBR	None	1	0.796424	1.25561	25.9727	25.8387	0.154774		8.64354	0.118278			0	TRUE	1.50607	TRUE	3	18	1	84.5313				N	N	N
D7	DmelT	RP49	UNKNOWN	SYBR	None				17.2475	17.1952	0.134216							TRUE	1.22155	TRUE	3	10	1	89.1568				N	N	N
E1	DmelT	Drsl3	UNKNOWN	SYBR	None	1	0.796283	1.25584	24.8128	24.8042	0.154985		7.60904	0.11837			0	TRUE	0.699633	TRUE	3	19	1	86.3213				N	N	N
E3	DmelT	Takl1	UNKNOWN	SYBR	None	1	0.648491	1.54204	32.5197	32.323	0.365964		15.1279	0.225051			0	TRUE	1.26465	TRUE	3	25	1	82.4469	87.6632			N	N	Y
E4	DmelT	CG8834	UNKNOWN	SYBR	None	1	0.860846	1.16165	22.6503	22.6653	0.0131317		5.47013	0.0778596			0	TRUE	0.242103	TRUE	3	18	1	90.0477				N	N	N
E5	DmelT	Npc2d	UNKNOWN	SYBR	None	1	0.846944	1.18072	26.8086	26.8492	0.0658738		9.654	0.0863197			0	TRUE	1.15692	TRUE	3	20	1	83.637				N	N	N
E6	DmelT	Npc2f	UNKNOWN	SYBR	None	1	0.796424	1.25561	25.6693	25.8387	0.154774		8.64354	0.118278			0	TRUE	1.50607	TRUE	3	19	1	84.5313				N	N	N
E7	DmelT	RP49	UNKNOWN	SYBR	None				17.2953	17.1952	0.134216							TRUE	1.22155	TRUE	3	11	1	89.1568				N	N	N
F1	DmelT	Drsl3	UNKNOWN	SYBR	None	1	0.796283	1.25584	24.6451	24.8042	0.154985		7.60904	0.11837			0	TRUE	0.699633	TRUE	3	18	1	86.3213				N	N	N
F3	DmelT	Takl1	UNKNOWN	SYBR	None	1	0.648491	1.54204	31.9008	32.323	0.365964		15.1279	0.225051			0	TRUE	1.26465	TRUE	3	24	1	82.596				N	N	N
F4	DmelT	CG8834	UNKNOWN	SYBR	None	1	0.860846	1.16165	22.671	22.6653	0.0131317		5.47013	0.0778596			0	TRUE	0.242103	TRUE	3	18	1	90.0477				N	N	N
F5	DmelT	Npc2d	UNKNOWN	SYBR	None	1	0.846944	1.18072	26.8137	26.8492	0.0658738		9.654	0.0863197			0	TRUE	1.15692	TRUE	3	20	1	83.786				N	N	N
F6	DmelT	Npc2f	UNKNOWN	SYBR	None	1	0.796424	1.25561	25.8741	25.8387	0.154774		8.64354	0.118278			0	TRUE	1.50607	TRUE	3	19	1	84.5313				N	N	N
F7	DmelT	RP49	UNKNOWN	SYBR	None				17.0427	17.1952	0.134216							TRUE	1.22155	TRUE	3	11	1	89.1568				N	N	N
G1		Drsl3	NTC	SYBR	None				36.9891	36.9891								TRUE	0.699633	TRUE	3	30	1	86.3213				N	N	N
G3		Takl1	NTC	SYBR	None				Undetermined									TRUE	1.26465	TRUE	3	39	1	61.582	93.1775			N	Y	Y
G4		CG8834	NTC	SYBR	None				37.094	37.094								TRUE	0.242103	TRUE	3	33	1	85.8748				N	N	N
G5		Npc2d	NTC	SYBR	None				Undetermined									TRUE	1.15692	TRUE	3	39	1	61.5774				N	Y	N
G6		Npc2f	NTC	SYBR	None				Undetermined									TRUE	1.50607	TRUE	3	39	1	82.4446	61.4283			N	Y	Y
G7		RP49	NTC	SYBR	None				Undetermined									TRUE	1.22155	TRUE	3	39	1	61.732				N	Y	N
Analysis Type	Singleplex
Endogenous Control	RP49
RQ Min/Max Confidence Level	95.0
Reference Sample	DmelT

## Sheet: rdgA-Drs
Block Type	96well
Chemistry	SYBR_GREEN
Instrument Type	steponeplus
Passive Reference	ROX
Well	Sample Name	Target Name	Task	Reporter	Quencher	RQ	RQ Min	RQ Max	Cт	Cт Mean	Cт SD	ΔCт	ΔCт Mean	ΔCт SE	HK Control ΔCт Mean	HK Control ΔCт SE	ΔΔCт	Automatic Ct Threshold	Ct Threshold	Automatic Baseline	Baseline Start	Baseline End	Efficiency	Tm1	Tm2	Tm3	Comments	HIGHSD	MTP
A1	DmwlT	rdgA	UNKNOWN	SYBR	None	1	0.81054	1.23375	26.8187	26.7729	0.126364		10.8334	0.109149			0	TRUE	1.33643	TRUE	3	19	1	83.9358				N	N
A2	DmwlT	Drs	UNKNOWN	SYBR	None	1	0.785308	1.27339	21.8658	21.6834	0.165951		5.74391	0.125582			0	TRUE	1.0852	TRUE	3	15	1	87.9576				N	N
A5	DmwlT	RP49	UNKNOWN	SYBR	None				16.0847	15.9395	0.140614							TRUE	1.03873	TRUE	3	10	1	89.1553				N	N
B1	DmwlT	rdgA	UNKNOWN	SYBR	None	1	0.81054	1.23375	26.87	26.7729	0.126364		10.8334	0.109149			0	TRUE	1.33643	TRUE	3	19	1	83.7868				N	N
B2	DmwlT	Drs	UNKNOWN	SYBR	None	1	0.785308	1.27339	21.5412	21.6834	0.165951		5.74391	0.125582			0	TRUE	1.0852	TRUE	3	14	1	87.8086				N	N
B5	DmwlT	RP49	UNKNOWN	SYBR	None				15.8039	15.9395	0.140614							TRUE	1.03873	TRUE	3	9	1	89.1553				N	N
C1	DmwlT	rdgA	UNKNOWN	SYBR	None	1	0.81054	1.23375	26.6301	26.7729	0.126364		10.8334	0.109149			0	TRUE	1.33643	TRUE	3	19	1	83.7868				N	N
C2	DmwlT	Drs	UNKNOWN	SYBR	None	1	0.785308	1.27339	21.6433	21.6834	0.165951		5.74391	0.125582			0	TRUE	1.0852	TRUE	3	14	1	87.8086				N	N
C5	DmwlT	RP49	UNKNOWN	SYBR	None				15.93	15.9395	0.140614							TRUE	1.03873	TRUE	3	9	1	89.0063				N	N
D1	DmwlW	rdgA	UNKNOWN	SYBR	None	1.56848	1.31313	1.8735	26.9195	26.8403	0.147065		10.184	0.0923349			-0.649371	TRUE	1.33643	TRUE	3	20	1	83.6379				N	N
D2	DmwlW	Drs	UNKNOWN	SYBR	None	2.96054	2.56481	3.41733	20.8694	20.8343	0.112819		4.17805	0.0745593			-1.56586	TRUE	1.0852	TRUE	3	13	1	87.8086				N	N
D5	DmwlW	RP49	UNKNOWN	SYBR	None				16.6089	16.6562	0.0628419							TRUE	1.03873	TRUE	3	10	1	89.0063				N	N
E1	DmwlW	rdgA	UNKNOWN	SYBR	None	1.56848	1.31313	1.8735	26.9307	26.8403	0.147065		10.184	0.0923349			-0.649371	TRUE	1.33643	TRUE	3	20	1	83.6379				N	N
E2	DmwlW	Drs	UNKNOWN	SYBR	None	2.96054	2.56481	3.41733	20.9254	20.8343	0.112819		4.17805	0.0745593			-1.56586	TRUE	1.0852	TRUE	3	13	1	87.6597				N	N
E5	DmwlW	RP49	UNKNOWN	SYBR	None				16.6323	16.6562	0.0628419							TRUE	1.03873	TRUE	3	10	1	88.8574				N	N
F1	DmwlW	rdgA	UNKNOWN	SYBR	None	1.56848	1.31313	1.8735	26.6706	26.8403	0.147065		10.184	0.0923349			-0.649371	TRUE	1.33643	TRUE	3	19	1	83.4889				N	N
F2	DmwlW	Drs	UNKNOWN	SYBR	None	2.96054	2.56481	3.41733	20.7081	20.8343	0.112819		4.17805	0.0745593			-1.56586	TRUE	1.0852	TRUE	3	13	1	87.5107				N	N
F5	DmwlW	RP49	UNKNOWN	SYBR	None				16.7275	16.6562	0.0628419							TRUE	1.03873	TRUE	3	10	1	88.8574				N	N
G1		rdgA	NTC	SYBR	None				Undetermined									TRUE	1.33643	TRUE	3	39	1	69.3383	92.873	88.7023		N	Y
G2		Drs	NTC	SYBR	None				Undetermined									TRUE	1.0852	TRUE	3	39	1	61.7416	86.9149			N	Y
G3		Drs	NTC	SYBR	None				Undetermined									TRUE	1.0852	TRUE	3	38	1	61.7431	81.1087	89.8977		N	Y
G5		RP49	NTC	SYBR	None				Undetermined									TRUE	1.03873	TRUE	3	38	1	61.7423	91.2411	82.6001		N	Y
G6		RP49	NTC	SYBR	None				Undetermined									TRUE	1.03873	TRUE	3	39	1	61.5934	87.0696	83.196		N	Y
Analysis Type	Singleplex
Endogenous Control	RP49
RQ Min/Max Confidence Level	95.0
Reference Sample	DmwlT

## Sheet: ROS
Block Type	96well
Chemistry	SYBR_GREEN
Instrument Type	steponeplus
Passive Reference	ROX
Well	Sample Name	Target Name	Task	Reporter	Quencher	RQ	RQ Min	RQ Max	Cт	Cт Mean	Cт SD	ΔCт	ΔCт Mean	ΔCт SE	HK Control ΔCт Mean	HK Control ΔCт SE	ΔΔCт	Automatic Ct Threshold	Ct Threshold	Automatic Baseline	Baseline Start	Baseline End	Efficiency	Tm1	Tm2	Tm3	Comments	HIGHSD	MTP
A6	DmelT	sod1	UNKNOWN	SYBR	None	1	0.849295	1.17745	21.517	21.4315	0.0895641		5.08079	0.0848794			0	TRUE	1.26052	TRUE	3	14	1	81.8362				N	N
A7	DmelT	cat	UNKNOWN	SYBR	None	1	0.795866	1.25649	18.4008	18.487	0.169222		2.13625	0.118642			0	TRUE	1.26012	TRUE	3	11	1	84.9753				N	N
A8	DmelT	Pxd	UNKNOWN	SYBR	None	1	0.743576	1.34485	27.178	26.9349	0.239822		10.5842	0.153955			0	TRUE	1.3157	TRUE	3	20	1	86.9138				N	N
A9	DmelT	RP49	UNKNOWN	SYBR	None				16.2439	16.3507	0.116584							TRUE	1.25652	TRUE	3	9	1	89.5985				N	N
B6	DmelT	sod1	UNKNOWN	SYBR	None	1	0.849295	1.17745	21.4392	21.4315	0.0895641		5.08079	0.0848794			0	TRUE	1.26052	TRUE	3	14	1	81.6871				N	N
B7	DmelT	cat	UNKNOWN	SYBR	None	1	0.795866	1.25649	18.3782	18.487	0.169222		2.13625	0.118642			0	TRUE	1.26012	TRUE	3	11	1	84.9753				N	N
B8	DmelT	Pxd	UNKNOWN	SYBR	None	1	0.743576	1.34485	26.6985	26.9349	0.239822		10.5842	0.153955			0	TRUE	1.3157	TRUE	3	20	1	86.9138				N	N
B9	DmelT	RP49	UNKNOWN	SYBR	None				16.4751	16.3507	0.116584							TRUE	1.25652	TRUE	3	10	1	89.5985				N	N
C6	DmelT	sod1	UNKNOWN	SYBR	None	1	0.849295	1.17745	21.3384	21.4315	0.0895641		5.08079	0.0848794			0	TRUE	1.26052	TRUE	3	14	1	81.6871				N	N
C7	DmelT	cat	UNKNOWN	SYBR	None	1	0.795866	1.25649	18.6819	18.487	0.169222		2.13625	0.118642			0	TRUE	1.26012	TRUE	3	11	1	84.9753				N	N
C8	DmelT	Pxd	UNKNOWN	SYBR	None	1	0.743576	1.34485	26.9284	26.9349	0.239822		10.5842	0.153955			0	TRUE	1.3157	TRUE	3	20	1	86.9138				N	N
C9	DmelT	RP49	UNKNOWN	SYBR	None				16.3333	16.3507	0.116584							TRUE	1.25652	TRUE	3	9	1	89.5985				N	N
D6	DmelW	sod1	UNKNOWN	SYBR	None	1.04748	0.873392	1.25627	20.899	21.0051	0.147198		5.01387	0.0944447			-0.0669216	TRUE	1.26052	TRUE	3	14	1	81.538				N	N
D7	DmelW	cat	UNKNOWN	SYBR	None	0.885474	0.489488	1.6018	18.9083	18.303	0.528697		2.31172	0.308011			0.175478	TRUE	1.26012	TRUE	3	12	1	84.8262				Y	N
D8	DmelW	Pxd	UNKNOWN	SYBR	None	0.525938	0.397261	0.696296	27.762	27.5025	0.242242		11.5112	0.1458			0.927034	TRUE	1.3157	TRUE	3	20	1	86.7647				N	N
D9	DmelW	RP49	UNKNOWN	SYBR	None				16.0667	15.9912	0.0713589							TRUE	1.25652	TRUE	3	9	1	89.3003				N	N
E6	DmelW	sod1	UNKNOWN	SYBR	None	1.04748	0.873392	1.25627	20.9432	21.0051	0.147198		5.01387	0.0944447			-0.0669216	TRUE	1.26052	TRUE	3	13	1	81.538				N	N
E7	DmelW	cat	UNKNOWN	SYBR	None	0.885474	0.489488	1.6018	17.9315	18.303	0.528697		2.31172	0.308011			0.175478	TRUE	1.26012	TRUE	3	10	1	84.8262				Y	N
E8	DmelW	Pxd	UNKNOWN	SYBR	None	0.525938	0.397261	0.696296	27.4631	27.5025	0.242242		11.5112	0.1458			0.927034	TRUE	1.3157	TRUE	3	20	1	86.7647				N	N
E9	DmelW	RP49	UNKNOWN	SYBR	None				15.9249	15.9912	0.0713589							TRUE	1.25652	TRUE	3	9	1	89.4494				N	N
F6	DmelW	sod1	UNKNOWN	SYBR	None	1.04748	0.873392	1.25627	21.1732	21.0051	0.147198		5.01387	0.0944447			-0.0669216	TRUE	1.26052	TRUE	3	14	1	81.538				N	N
F7	DmelW	cat	UNKNOWN	SYBR	None	0.885474	0.489488	1.6018	18.0692	18.303	0.528697		2.31172	0.308011			0.175478	TRUE	1.26012	TRUE	3	11	1	84.8262				Y	N
F8	DmelW	Pxd	UNKNOWN	SYBR	None	0.525938	0.397261	0.696296	27.2823	27.5025	0.242242		11.5112	0.1458			0.927034	TRUE	1.3157	TRUE	3	20	1	86.7647				N	N
F9	DmelW	RP49	UNKNOWN	SYBR	None				15.9821	15.9912	0.0713589							TRUE	1.25652	TRUE	3	9	1	89.4494				N	N
G6		sod1	NTC	SYBR	None				Undetermined									TRUE	1.26052	TRUE	3	39	1	61.4095	76.7668			N	Y
G7		cat	NTC	SYBR	None				Undetermined									TRUE	1.26012	TRUE	3	39	1	61.7129	91.8347	88.2559		N	Y
G8		Pxd	NTC	SYBR	None				Undetermined									TRUE	1.3157	TRUE	3	39	1	93.6241	76.4756			N	Y
G9		RP49	NTC	SYBR	None				Undetermined									TRUE	1.25652	TRUE	3	39	1	61.7183				N	N
Analysis Type	Singleplex
Endogenous Control	RP49
RQ Min/Max Confidence Level	95.0
Reference Sample	DmelT

## Sheet: sucrose and starch
Block Type	96well
Chemistry	SYBR_GREEN
Instrument Type	steponeplus
Passive Reference	ROX
Well	Sample Name	Target Name	Task	Reporter	Quencher	RQ	RQ Min	RQ Max	Cт	Cт Mean	Cт SD	ΔCт	ΔCт Mean	ΔCт SE	HK Control ΔCт Mean	HK Control ΔCт SE	ΔΔCт	Automatic Ct Threshold	Ct Threshold	Automatic Baseline	Baseline Start	Baseline End	Efficiency	Tm1	Tm2	Tm3	Comments	HIGHSD	EXPFAIL	MTP
A5	DmelT	Mal-A1	UNKNOWN	SYBR	None	1	0.776478	1.28787	31.915	31.7927	0.203771		13.8961	0.131457			0	TRUE	1.98982	TRUE	3	24	1	86.6174				N	N	N
A6	DmelT	Mal-A2	UNKNOWN	SYBR	None	1	0.818114	1.22232	37.0126	36.878	0.149414		18.9814	0.104315			0	TRUE	0.364063	TRUE	3	31	1	81.8443				N	N	N
A7	DmelT	Mal-A3	UNKNOWN	SYBR	None	1	0.692357	1.44434	29.0031	29.0879	0.31491		11.1914	0.19104			0	TRUE	0.334726	TRUE	3	24	1	76.0329	85.8745			N	N	Y
A8	DmelT	Mal-A4	UNKNOWN	SYBR	None	1	0.707746	1.41294	33.1932	33.1587	0.294051		15.2622	0.179617			0	TRUE	1.20051	TRUE	3	25	1	89.4533				N	N	N
A11	DmelT	Rp49	UNKNOWN	SYBR	None				17.7838	17.8965	0.10159							TRUE	1.37093	TRUE	3	11	1	89.152				N	N	N
B5	DmelT	Mal-A1	UNKNOWN	SYBR	None	1	0.776478	1.28787	31.9056	31.7927	0.203771		13.8961	0.131457			0	TRUE	1.98982	TRUE	3	24	1	86.6174				N	N	N
B6	DmelT	Mal-A2	UNKNOWN	SYBR	None	1	0.818114	1.22232	36.7172	36.878	0.149414		18.9814	0.104315			0	TRUE	0.364063	TRUE	3	31	1	82.2918	63.9453			N	N	Y
B7	DmelT	Mal-A3	UNKNOWN	SYBR	None	1	0.692357	1.44434	28.8241	29.0879	0.31491		11.1914	0.19104			0	TRUE	0.334726	TRUE	3	23	1	76.0329	85.7254			N	N	Y
B8	DmelT	Mal-A4	UNKNOWN	SYBR	None	1	0.707746	1.41294	33.434	33.1587	0.294051		15.2622	0.179617			0	TRUE	1.20051	TRUE	3	26	1	89.4533				N	N	N
B11	DmelT	Rp49	UNKNOWN	SYBR	None				17.9247	17.8965	0.10159							TRUE	1.37093	TRUE	3	12	1	89.152				N	N	N
C5	DmelT	Mal-A1	UNKNOWN	SYBR	None	1	0.776478	1.28787	31.5574	31.7927	0.203771		13.8961	0.131457			0	TRUE	1.98982	TRUE	3	23	1	86.4682				N	N	N
C6	DmelT	Mal-A2	UNKNOWN	SYBR	None	1	0.818114	1.22232	36.9041	36.878	0.149414		18.9814	0.104315			0	TRUE	0.364063	TRUE	3	31	1	81.6951				N	N	N
C7	DmelT	Mal-A3	UNKNOWN	SYBR	None	1	0.692357	1.44434	29.4365	29.0879	0.31491		11.1914	0.19104			0	TRUE	0.334726	TRUE	3	24	1	76.0329				N	N	N
C8	DmelT	Mal-A4	UNKNOWN	SYBR	None	1	0.707746	1.41294	32.849	33.1587	0.294051		15.2622	0.179617			0	TRUE	1.20051	TRUE	3	25	1	89.3042				N	N	N
C11	DmelT	Rp49	UNKNOWN	SYBR	None				17.981	17.8965	0.10159							TRUE	1.37093	TRUE	3	11	1	89.0028				N	N	N
D5	DmelW	Mal-A1	UNKNOWN	SYBR	None	678.006	590.118	778.985	21.6502	21.7101	0.113722		4.49099	0.0721414			-9.40516	TRUE	1.98982	TRUE	3	14	1	86.1699				N	N	N
D6	DmelW	Mal-A2	UNKNOWN	SYBR	None	139.088	115.769	167.103	29.1271	29.0807	0.156834		11.8616	0.0953546			-7.11985	TRUE	0.364063	TRUE	3	23	1	81.2477				N	N	N
D7	DmelW	Mal-A3	UNKNOWN	SYBR	None	5.57291	5.08625	6.10612	25.9759	25.932	0.0638949		8.71294	0.0474802			-2.47843	TRUE	0.334726	TRUE	3	20	1	85.5763	75.4365			N	N	Y
D8	DmelW	Mal-A4	UNKNOWN	SYBR	None	12.5605	11.5763	13.6284	28.8906	28.8305	0.0520861		11.6114	0.0424009			-3.65082	TRUE	1.20051	TRUE	3	21	1	89.4533				N	N	N
D11	DmelW	Rp49	UNKNOWN	SYBR	None				17.1597	17.2191	0.051774							TRUE	1.37093	TRUE	3	10	1	89.0028				N	N	N
E5	DmelW	Mal-A1	UNKNOWN	SYBR	None	678.006	590.118	778.985	21.6389	21.7101	0.113722		4.49099	0.0721414			-9.40516	TRUE	1.98982	TRUE	3	14	1	86.1699				N	N	N
E6	DmelW	Mal-A2	UNKNOWN	SYBR	None	139.088	115.769	167.103	29.2091	29.0807	0.156834		11.8616	0.0953546			-7.11985	TRUE	0.364063	TRUE	3	23	1	81.2477				N	N	N
E7	DmelW	Mal-A3	UNKNOWN	SYBR	None	5.57291	5.08625	6.10612	25.8587	25.932	0.0638949		8.71294	0.0474802			-2.47843	TRUE	0.334726	TRUE	3	21	1	85.5763	75.2874			N	N	Y
E8	DmelW	Mal-A4	UNKNOWN	SYBR	None	12.5605	11.5763	13.6284	28.8027	28.8305	0.0520861		11.6114	0.0424009			-3.65082	TRUE	1.20051	TRUE	3	21	1	89.4533				N	N	N
E11	DmelW	Rp49	UNKNOWN	SYBR	None				17.2426	17.2191	0.051774							TRUE	1.37093	TRUE	3	11	1	89.152				N	N	N
F5	DmelW	Mal-A1	UNKNOWN	SYBR	None	678.006	590.118	778.985	21.8412	21.7101	0.113722		4.49099	0.0721414			-9.40516	TRUE	1.98982	TRUE	3	14	1	86.319				N	N	N
F6	DmelW	Mal-A2	UNKNOWN	SYBR	None	139.088	115.769	167.103	28.9059	29.0807	0.156834		11.8616	0.0953546			-7.11985	TRUE	0.364063	TRUE	3	23	1	81.2477				N	N	N
F7	DmelW	Mal-A3	UNKNOWN	SYBR	None	5.57291	5.08625	6.10612	25.9615	25.932	0.0638949		8.71294	0.0474802			-2.47843	TRUE	0.334726	TRUE	3	21	1	85.5763	75.4365			N	N	Y
F8	DmelW	Mal-A4	UNKNOWN	SYBR	None	12.5605	11.5763	13.6284	28.7982	28.8305	0.0520861		11.6114	0.0424009			-3.65082	TRUE	1.20051	TRUE	3	21	1	89.4533				N	N	N
F11	DmelW	Rp49	UNKNOWN	SYBR	None				17.2549	17.2191	0.051774							TRUE	1.37093	TRUE	3	10	1	89.152				N	N	N
G5		Mal-A1	NTC	SYBR	None				Undetermined									TRUE	1.98982	TRUE	3	39	1	61.708	90.4955	78.4137		N	Y	Y
G6		Mal-A2	NTC	SYBR	None				Undetermined									TRUE	0.364063	TRUE	3	39	1	61.5588	91.8379			N	Y	Y
G7		Mal-A3	NTC	SYBR	None				29.6205	29.6205								TRUE	0.334726	TRUE	3	25	1	76.0329				N	N	N
G8		Mal-A4	NTC	SYBR	None				Undetermined									TRUE	1.20051	TRUE	3	39	1	62.3143	93.4794	80.5064		N	Y	Y
G11		Rp49	NTC	SYBR	None				Undetermined									TRUE	1.37093	TRUE	3	39	1	61.7094				N	Y	N
Analysis Type	Singleplex
Endogenous Control	RP49
RQ Min/Max Confidence Level	95.0
Reference Sample	DmelT
